# Supplementary material for: Comparative Genomic Analysis Reveals the Metabolism and Evolution of the Thermophilic Archaeal Genus Metallosphaera
Source: Front Microbiol. 2020 Jun 19;11:1192. doi: 10.3389/fmicb.2020.01192 (PMC7325606; doi:10.3389/fmicb.2020.01192)
Supplement: TABLE S3 — Statistics of Mobile genetic elements (MGEs) (A), prophages and prophage remnants (B), Transposons (C), CRISPR-Cas related sequences (D) present in the genomes of Metallosphaera spp. [file Table_3.XLSX]

## Sheet: Statistics
Supplement Table S3A: Statistics of Mobile genetic elements (MGEs) present in the genomes of Metallosphaera spp.
	transpsons	Genomic island sequences	phage sequences	CRISPR-Cas sequwnces	size (Mb)	Coding density (%)
Metallosphaera_cuprina_Ar_4	65	21	8	296	1.84	87.9
Metallosphaera_hakonensis_HO1-1	149	64	8	389	2.54	80.3
Metallosphaera_hakonensis_JCM_8857	76	245	15	119	2.39	81.5
Metallosphaera_sp._My_r02	277	372	0	55	1.85	82.5
Metallosphaera_sp._My_r05	214	240	0	3	1.85	87.9
Metallosphaera_sp._My_r06	112	112	8	0	1.85	89
Metallosphaera_sedula_ARS50-1	34	116	25	388	2.19	89.4
Metallosphaera_sedula_ARS50-2	34	116	26	388	2.19	89.4
Metallosphaera_sedula_ARS120-1	34	116	26	388	2.19	89.3
Metallosphaera_sedula_ARS120-2	34	116	26	388	2.19	89.3
Metallosphaera_sedula_CuR1	35	116	25	388	2.19	89.2
Metallosphaera_sedula_DSM_5348	34	116	9	388	2.19	89.3
Metallosphaera_sedula_SARC-M1	34	116	27	388	2.19	89.3
Metallosphaera_sp._Obs4	208	57	0	4	2.7	83.2
Metallosphaera_sp._YNP_08	181	140	0	6	1.38	78.4
Metallosphaera_sp._YNP_14	213	240	3	3	1.38	84.5
Metallosphaera_sp._UBA165	72	103	0	3	1.83	88.5
Metallosphaera_tengchongensis_Ric-A	98	100	33	410	2.1	85.4
Metallosphaera_yellowstonensis_MK1	283	487	23	254	2.82	82.4

## Sheet: Transposons
Supplement Table S3B: Transposons present in the genomes of Metallosphaera spp. identified with Isfinder.
M._sp_My_r05		M._sp_My_r06		M._sp_My_r02		M._tengchongensis_Ric-A		M._sedula_DSM_5348		M._hakonensis_JCM_8857		M._hakonensis_HO1-1		M._sp_YNP_08		Metallosphaera ._sp_YNP_14		Metallosphaera ._sp_UBA165		M._sp_Obs4
Gene ID:	Transposon hits	Gene ID:	Transposon hits	Gene ID:	Transposon hits	Gene ID:	Transposon hits	Gene ID:	Transposon hits	Gene ID:	Transposon hits	Gene ID:	Transposon hits	Gene ID:	Transposon hits	Gene ID:	Transposon hits	Gene ID:	Transposon hits	Gene ID:	Transposon hits
2502877396	ISSis6	2554137391	ISArsp14_aa9	Myr02_00004	ISSis6_aa1	EIGBGHOE_00013	ISArsp14_aa5	WP_054836002.1	ISArsp9_aa5	WP_054836002.1	ISArsp9_aa5	WP_054836002.1	ISArsp9_aa5	2502894974	ISShvi3_aa1	2502877396	ISSis6_aa1	JBPJAKGA_00009	ISSto9_aa1	Ga0254970_100211	ISStma11_aa2
2502877398	ISSis6	2554137424	TnAs1_aa3	Myr02_00007	ISSis6_aa1	EIGBGHOE_00017	TnAs1_aa3	WP_054836004.1	TnAs1_aa3	WP_054836004.1	TnAs1_aa3	WP_054836004.1	TnAs1_aa3	2502894983	ISArsp14_aa5	2502877398	ISSis6_aa1	JBPJAKGA_00010	ISSto9_aa1	Ga0254970_100214	ISC1200_aa1
2502877399	ISSis6	2554137437	TnBth2_aa5	Myr02_00008	ISSis6_aa1	EIGBGHOE_00019	ISBli29_aa2	WP_054836008.1	ISStma11_aa2	WP_054836008.1	ISStma11_aa2	WP_054836008.1	ISStma11_aa2	2502895001	ISSis4_aa1	2502877399	ISSis6_aa1	JBPJAKGA_00038	ISStma11_aa2	Ga0254970_10048	ISHce1_aa4
2502877403	ISC1205	2554137512	ISSis5_aa2	Myr02_00012	ISC1205_aa1	EIGBGHOE_00033	ISArsp14_aa5	WP_054836065.1	ISArsp14_aa5	WP_054836065.1	ISArsp14_aa5	WP_054836065.1	ISArsp14_aa5	2502895039	ISSto12_aa2	2502877403	ISC1205_aa1	JBPJAKGA_00043	ISAcba1_aa2	Ga0254970_100411	ISSis6_aa1
2502877404	ISC1205	2554137533	ISC1290_aa1	Myr02_00017	ISCco2_aa3	EIGBGHOE_00072	ISArsp14_aa5	WP_054836198.1	ISArsp14_aa5	WP_054836189.1	ISShvi3_aa1	WP_054836198.1	ISArsp14_aa5	2502895049	ISMye1_aa1	2502877404	ISC1205_aa1	JBPJAKGA_00087	ISStma11_aa2	Ga0254970_10059	ISArsp14_aa5
2502877410	ISCco2	2554137534	ISC1290_aa1	Myr02_00029	ISStma11_aa2	EIGBGHOE_00079	ISArsp14_aa5	WP_054836391.1	ISHasp2_aa2	WP_054836198.1	ISArsp14_aa5	WP_054836391.1	ISHasp2_aa2	2502895059	ISSis5_aa2	2502877410	ISCco2_aa3	JBPJAKGA_00103	ISArsp14_aa5	Ga0254970_100510	ISSto9_aa1
2502877453	ISMye1	2554137586	ISStma11_aa2	Myr02_00088	ISArsp14_aa5	EIGBGHOE_00080	ISArsp14_aa11	WP_054836444.1	ISArsp14_aa5	WP_054836286.1	ISTsi3_aa2	WP_054836444.1	ISArsp14_aa5	2502895075	ISSis6_aa1	2502877453	ISMye1_aa1	JBPJAKGA_00141	ISShvi3_aa1	Ga0254970_100511	ISSto9_aa1
2502877485	ISArsp14	2554137622	ISSis4_aa1	Myr02_00095	ISShvi3_aa1	EIGBGHOE_00147	ISArsp14_aa5	WP_054836455.1	ISArsp14_aa5	WP_054836287.1	ISSis4_aa1	WP_054836455.1	ISArsp14_aa5	2502895079	ISDka2_aa2	2502877485	ISArsp14_aa5	JBPJAKGA_00148	ISArsp14_aa5	Ga0254970_100631	ISC1225_aa1
2502877493	ISShvi3	2554137695	ISNma21_aa2	Myr02_00127	ISC1205_aa1	EIGBGHOE_00173	ISTvo5_aa2	WP_054836479.1	ISStma11_aa2	WP_054836391.1	ISHasp2_aa2	WP_054836479.1	ISStma11_aa2	2502895081	ISSis2_aa2	2502877493	ISShvi3_aa1	JBPJAKGA_00155	ISMma22_aa2	Ga0254970_100632	ISC1225_aa1
2502877513	ISC1205	2554137699	ISSis5_aa2	Myr02_00128	ISC1205_aa1	EIGBGHOE_00212	TnAs1_aa4	WP_054836482.1	ISArsp9_aa2	WP_054836444.1	ISArsp14_aa5	WP_054836482.1	ISArsp9_aa2	2502895099	ISMye1_aa1	2502877513	ISC1205_aa1	JBPJAKGA_00233	ISArsp14_aa11	Ga0254970_100723	TnAs1_aa3
2502877529	ISC1205	2554137700	ISSis5_aa2	Myr02_00129	ISC1205_aa1	EIGBGHOE_00261	ISArsp14_aa6	WP_054836552.1	ISArsp14_aa6	WP_054836455.1	ISArsp14_aa5	WP_054836552.1	ISArsp14_aa6	2502895100	ISMye1_aa1	2502877529	ISC1205_aa1	JBPJAKGA_00243	ISC1234_aa1	Ga0254970_10083	ISMno23_aa1
2502877530	ISC1205	2554137701	ISSis7_aa1	Myr02_00132	ISArsp14_aa5	EIGBGHOE_00263	ISArsp14_aa5	WP_054836553.1	ISArsp14_aa5	WP_054836479.1	ISStma11_aa2	WP_054836553.1	ISArsp14_aa5	2502895102	ISSto9_aa1	2502877530	ISC1205_aa1	JBPJAKGA_00247	ISArsp14_aa5	Ga0254970_10089	ISArsp14_aa5
2502877531	ISC1205	2554137736	IS231K_aa3	Myr02_00140	ISArsp14_aa9	EIGBGHOE_00282	ISStma11_aa2	WP_054836554.1	ISSis7_aa1	WP_054836482.1	ISArsp9_aa2	WP_054836554.1	ISSis7_aa1	2502895104	ISMye1_aa1	2502877531	ISC1205_aa1	JBPJAKGA_00293	ISArsp14_aa5	Ga0254970_100848	ISC1926_aa2
2502877534	ISArsp14	2554137771	ISC1904_aa2	Myr02_00152	ISC1205_aa1	EIGBGHOE_00312	ISTsi1_aa2	WP_054836581.1	TnAs1_aa4	WP_054836552.1	ISArsp14_aa6	WP_054836581.1	TnAs1_aa4	2502895113	ISSis4_aa1	2502877534	ISArsp14_aa5	JBPJAKGA_00366	ISArsp14_aa5	Ga0254970_10098	ISArsp14_aa5
2502877545	ISArsp14	2554137778	TnBth2_aa1	Myr02_00168	ISC1926_aa2	EIGBGHOE_00359	ISSod25_aa1	WP_054836603.1	ISArsp9_aa4	WP_054836553.1	ISArsp14_aa5	WP_054836603.1	ISArsp9_aa4	2502895117	ISMye1_aa1	2502877545	ISArsp14_aa9	JBPJAKGA_00367	ISArsp14_aa5	Ga0254970_100911	ISArsp14_aa5
2502877572	ISC1926	2554137784	ISArsp14_aa5	Myr02_00173	TnAs1_aa3	EIGBGHOE_00365	ISArsp14_aa5	WP_054836608.1	TnAs1_aa3	WP_054836554.1	ISSis7_aa1	WP_054836608.1	TnAs1_aa3	2502895127	ISC1926_aa2	2502877572	ISC1926_aa2	JBPJAKGA_00374	IS231K_aa3	Ga0254970_100928	ISArsp14_aa5
2502877577	TnAs1	2554137790	ISSis5_aa1	Myr02_00187	TnAs1_aa3	EIGBGHOE_00387	ISTsi1_aa2	WP_054836639.1	ISArsp14_aa11	WP_054836581.1	TnAs1_aa4	WP_054836639.1	ISArsp14_aa11	2502895153	TnAs1_aa3	2502877577	TnAs1_aa3	JBPJAKGA_00495	ISShes11_aa3	Ga0254970_101018	ISArsp14_aa5
2502877594	TnAs1	2554137794	ISC1926_aa2	Myr02_00191	TnBth2_aa1	EIGBGHOE_00392	ISArsp14_aa5	WP_054836657.1	ISC1332_aa1	WP_054836603.1	ISArsp9_aa4	WP_054836657.1	ISC1332_aa1	2502895159	ISSis4_aa1	2502877594	TnAs1_aa3	JBPJAKGA_00507	ISArsp14_aa11	Ga0254970_10115	ISArsp14_aa5
2502877598	TnBth2	2554137827	IS231K_aa3	Myr02_00210	ISC1290_aa1	EIGBGHOE_00500	TnAs1_aa3	WP_054836691.1	ISCsa5_aa1	WP_054836608.1	TnAs1_aa3	WP_054836691.1	ISCsa5_aa1	2502895160	ISC1205_aa1	2502877598	TnBth2_aa1	JBPJAKGA_00519	ISNma16_aa1	Ga0254970_101131	ISC1316_aa1
2502877616	ISC1290	2554137844	ISSto12_aa2	Myr02_00211	ISC1290_aa1	EIGBGHOE_00505	TnBth2_aa1	WP_054836709.1	ISSto1_aa1	WP_054836639.1	ISArsp14_aa11	WP_054836709.1	ISSto1_aa1	2502895161	ISSis4_aa1	2502877616	ISC1290_aa1	JBPJAKGA_00529	ISArsp14_aa5	Ga0254970_10122	ISArsp14_aa5
2502877617	ISC1290	2554137881	ISArsp14_aa5	Myr02_00212	ISC1290_aa1	EIGBGHOE_00513	ISSis7_aa1	WP_054836726.1	IS231K_aa3	WP_054836657.1	ISC1332_aa1	WP_054836726.1	IS231K_aa3	2502895163	ISSis4_aa1	2502877617	ISC1290_aa1	JBPJAKGA_00554	TnAs1_aa3	Ga0254970_10126	ISC1316_aa1
2502877618	ISC1290	2554137888	ISShvi3_aa1	Myr02_00253	ISSis4_aa1	EIGBGHOE_00514	ISC1904_aa2	WP_054836785.1	ISArsp14_aa11	WP_054836691.1	ISCsa5_aa1	WP_054836785.1	ISArsp14_aa11	2502895168	ISArsp14_aa11	2502877618	ISC1290_aa1	JBPJAKGA_00631	IS231K_aa3	Ga0254970_10127	ISC1316_aa1
2502877676	ISSto12	2554137907	ISC1205_aa1	Myr02_00254	ISC1205_aa1	EIGBGHOE_00521	TnAs1_aa3	WP_054836907.1	ISArsp14_aa5	WP_054836709.1	ISSto1_aa1	WP_054836907.1	ISArsp14_aa5	2502895171	ISSto12_aa1	2502877676	ISSto12_aa2	JBPJAKGA_00650	ISArsp14_aa5	Ga0254970_10128	ISC1316_aa1
2502877683	IS231K	2554137956	ISStma11_aa2	Myr02_00262	ISSis4_aa1	EIGBGHOE_00543	ISSto11_aa2	WP_054836937.1	ISArsp14_aa5	WP_054836717.1	ISSto12_aa2	WP_054836937.1	ISArsp14_aa5	2502895245	ISSto12_aa2	2502877683	IS231K_aa3	JBPJAKGA_00808	ISHce1_aa4	Ga0254970_101217	ISC796_aa1
2502877703	ISSto12	2554137969	ISCco2_aa3	Myr02_00277	ISSto12_aa2	EIGBGHOE_00562	ISArsp14_aa5	WP_054836973.1	ISStma11_aa2	WP_054836726.1	IS231K_aa3	WP_054836973.1	ISStma11_aa2	2502895262	ISC1316_aa1	2502877703	ISSto12_aa2	JBPJAKGA_00830	ISArsp14_aa5	Ga0254970_101218	ISSto9_aa1
2502877708	ISC1926	2554137973	ISC1205_aa1	Myr02_00292	ISC1316_aa1	EIGBGHOE_00589	TnBth2_aa4	WP_054837083.1	ISCsa5_aa1	WP_054836785.1	ISArsp14_aa11	WP_054837083.1	ISCsa5_aa1	2502895348	ISMye1_aa1	2502877708	ISC1926_aa2	JBPJAKGA_00872	ISStma11_aa2	Ga0254970_101219	ISSto9_aa1
2502877724	TnAs1	2554137999	ISC1913_aa2	Myr02_00293	ISC1316_aa1	EIGBGHOE_00603	ISDka2_aa2	WP_054837089.1	ISArsp14_aa5	WP_054836879.1	ISC1078_aa1	WP_054837089.1	ISArsp14_aa5	2502895357	ISMye2_aa1	2502877724	TnAs1_aa3	JBPJAKGA_00951	ISArsp9_aa5	Ga0254970_101220	ISSto9_aa1
2502877729	ISSis7	2554138002	ISC1926_aa2	Myr02_00317	ISSto12_aa2	EIGBGHOE_00751	ISStma11_aa2	WP_054837123.1	TnBth2_aa1	WP_054836901.1	ISC1234_aa1	WP_054837123.1	TnBth2_aa1	2502895383	ISSis4_aa1	2502877729	ISSis7_aa1	JBPJAKGA_00954	ISArsp14_aa11	Ga0254970_10136	ISArsp14_aa5
2502877738	ISSto12	2554138020	ISC1225_aa1	Myr02_00318	ISSto12_aa2	EIGBGHOE_00790	ISStma11_aa2	WP_054837127.1	ISArsp14_aa5	WP_054836907.1	ISArsp14_aa5	WP_054837127.1	ISArsp14_aa5	2502895410	ISSis4_aa1	2502877738	ISSto12_aa2	JBPJAKGA_00956	TnAs1_aa3	Ga0254970_101320	ISArsp14_aa5
2502877742	ISArsp9	2554138035	ISHce1_aa4	Myr02_00319	ISSto12_aa2	EIGBGHOE_00817	ISArsp9_aa5	WP_054837133.1	ISArsp14_aa5	WP_054836937.1	ISArsp14_aa5	WP_054837133.1	ISArsp14_aa5	2502895415	ISSto12_aa2	2502877742	ISArsp9_aa4	JBPJAKGA_00967	ISStma11_aa2	Ga0254970_101321	ISArsp14_aa6
2502877769	ISC1926	2554138046	ISSto13_aa2	Myr02_00320	ISSto12_aa1	EIGBGHOE_00820	ISArsp14_aa11	WP_054837176.1	ISC1439A_aa1	WP_054836973.1	ISStma11_aa2	WP_054837176.1	ISC1439A_aa1	2502895438	ISSis4_aa1	2502877769	ISC1926_aa2	JBPJAKGA_00981	ISArsp14_aa5	Ga0254970_101420	ISCco2_aa3
2502877802	ISC1316	2554138047	ISSis5_aa2	Myr02_00321	ISSto12_aa1	EIGBGHOE_00822	TnAs1_aa3	WP_054837203.1	ISBli29_aa2	WP_054837035.1	ISC1904_aa2	WP_054837203.1	ISBli29_aa2	2502895439	TnBth2_aa1	2502877802	ISC1316_aa1	JBPJAKGA_01014	TnBth2_aa4	Ga0254970_101517	IS231K_aa3
2502877803	ISSis4	2554138048	ISArsp14_aa11	Myr02_00327	ISShes11_aa3	EIGBGHOE_00830	ISStma11_aa2	WP_054837210.1	ISC1058_aa1	WP_054837068.1	ISC1316_aa1	WP_054837210.1	ISC1058_aa1	2502895454	IS1921_aa2	2502877803	ISSis4_aa1	JBPJAKGA_01053	TnBth2_aa5	Ga0254970_101713	ISC1904_aa2
2502877804	ISSis4	2554138050	TnAs1_aa3	Myr02_00334	ISMye1_aa1	EIGBGHOE_00845	TnBth2_aa1	WP_054837241.1	ISSto9_aa1	WP_054837083.1	ISCsa5_aa1	WP_054837241.1	ISSto9_aa1	2502895455	ISSis7_aa1	2502877804	ISSis4_aa1	JBPJAKGA_01056	ISArsp14_aa11	Ga0254970_101714	IS1921_aa2
2502877812	ISArsp14	2554138057	ISSto12_aa2	Myr02_00336	ISMye1_aa1	EIGBGHOE_00929	ISArsp14_aa9	WP_054837244.1	ISArsp14_aa5	WP_054837089.1	ISArsp14_aa5	WP_054837244.1	ISArsp14_aa5	2502895473	ISArsp14_aa5	2502877812	ISArsp14_aa5	JBPJAKGA_01080	ISArsp9_aa4	Ga0254970_101715	ISSis7_aa2
2502877819	ISArsp14	2554138058	ISSto12_aa1	Myr02_00352	ISArsp9_aa5	EIGBGHOE_00944	ISTvo5_aa2	WP_054837287.1	ISPre3_aa4	WP_054837102.1	ISC1174_aa1	WP_054837287.1	ISPre3_aa4	2502895474	ISArsp14_aa5	2502877819	ISArsp14_aa5	JBPJAKGA_01103	ISSto11_aa1	Ga0254970_10187	ISArsp14_aa5
2502877820	ISC1913	2554138060	ISStma11_aa2	Myr02_00355	IS1921_aa1	EIGBGHOE_00945	ISSis2_aa2	WP_054837306.1	ISCco2_aa3	WP_054837123.1	TnBth2_aa1	WP_054837306.1	ISCco2_aa3	2502895486	ISStma11_aa2	2502877820	ISC1913_aa2	JBPJAKGA_01104	ISC1904_aa2	Ga0254970_10188	ISArsp14_aa5
2502877839	ISSto12	2554138107	ISSto13_aa2	Myr02_00356	ISSis7_aa1	EIGBGHOE_00950	ISArsp14_aa5	WP_054837428.1	ISArsp14_aa5	WP_054837127.1	ISArsp14_aa5	WP_054837428.1	ISArsp14_aa5	2502895520	ISSis6_aa1	2502877839	ISSto12_aa2	JBPJAKGA_01166	ISMma22_aa2	Ga0254970_102020	ISC1926_aa2
2502877863	ISC1926	2554138108	ISC1926_aa2	Myr02_00357	ISSis5_aa2	EIGBGHOE_00951	ISArsp14_aa5	WP_054837438.1	ISArsp14_aa9	WP_054837133.1	ISArsp14_aa5	WP_054837438.1	ISArsp14_aa9	2502895535	ISStma11_aa2	2502877863	ISC1926_aa1	JBPJAKGA_01205	TnAs1_aa3	Ga0254970_10223	ISArsp14_aa11
2502877864	ISC1926	2554138120	ISStma11_aa2	Myr02_00358	ISSto11_aa2	EIGBGHOE_01045	ISSis2_aa2	WP_054837514.1	ISSis7_aa1	WP_054837143.1	ISArsp14_aa5	WP_054837514.1	ISSis7_aa1	2502895546	ISSto12_aa2	2502877864	ISC1926_aa2	JBPJAKGA_01211	ISArsp14_aa5	Ga0254970_10233	ISArsp14_aa5
2502877866	ISSto12	2554138122	IS231K_aa3	Myr02_00359	ISSis5_aa2	EIGBGHOE_01072	ISCco3_aa2	WP_054837545.1	ISSis4_aa1	WP_054837155.1	ISBsu3_aa2	WP_054837545.1	ISSis4_aa1	2502895562	ISMye1_aa1	2502877866	ISSto12_aa2	JBPJAKGA_01230	ISArsp9_aa2	Ga0254970_10234	ISSis1_aa1
2502877872	ISArsp14	2554138158	TnAs1_aa3	Myr02_00360	ISArsp14_aa11	EIGBGHOE_01094	ISArsp14_aa5	WP_054837566.1	ISArsp14_aa11	WP_054837161.1	ISArsp14_aa5	WP_054837566.1	ISArsp14_aa11	2502895563	ISMye1_aa1	2502877872	ISArsp14_aa5	JBPJAKGA_01274	ISArsp14_aa9	Ga0254970_102416	ISArsp14_aa5
2502877875	ISSto12	2554138230	TnShfr1_aa3	Myr02_00362	TnAs1_aa3	EIGBGHOE_01097	ISSis2_aa2	WP_054837576.1	ISSto6_aa1	WP_054837163.1	ISArsp14_aa5	WP_054837576.1	ISSto6_aa1	2502895564	ISMye1_aa1	2502877875	ISSto12_aa2	JBPJAKGA_01354	ISStma11_aa2	Ga0254970_102719	ISSis5_aa1
2502877895	ISSis6	2554138236	ISSis4_aa1	Myr02_00370	ISSto12_aa2	EIGBGHOE_01106	ISSis2_aa2	WP_110368639.1	ISC1212_aa2	WP_054837167.1	ISStma11_aa2	WP_110368639.1	ISC1212_aa2	2502895595	ISSis7_aa1	2502877895	ISSis6_aa1	JBPJAKGA_01394	ISC1234_aa1	Ga0254970_102720	ISSis7_aa1
2502877898	ISMye1	2554138282	ISArsp14_aa5	Myr02_00371	ISSto12_aa1	EIGBGHOE_01132	IS231K_aa3	WP_110368643.1	ISC1316_aa1	WP_054837176.1	ISC1439A_aa1	WP_110368643.1	ISC1316_aa1	2502895614	ISMye2_aa1	2502877898	ISMye1_aa1	JBPJAKGA_01416	ISArsp14_aa5	Ga0254970_102721	ISC1316_aa1
2502877904	ISArsp14	2554138298	ISAcba1_aa2	Myr02_00373	ISStma11_aa2	EIGBGHOE_01168	ISBsu3_aa2	WP_110368647.1	ISC1250_aa1	WP_054837203.1	ISBli29_aa2	WP_110368647.1	ISC1250_aa1	2502895629	ISC1904_aa1	2502877904	ISArsp14_aa5	JBPJAKGA_01417	ISArsp14_aa5	Ga0254970_102722	IS1921_aa2
2502877905	ISArsp14	2554138308	ISC1205_aa1	Myr02_00386	ISSis4_aa1	EIGBGHOE_01174	ISArsp14_aa5	WP_110368655.1	ISTsi1_aa2	WP_054837207.1	TnAs1_aa3	WP_110368655.1	ISTsi1_aa2	2502895644	ISArsp14_aa5	2502877905	ISArsp14_aa5	JBPJAKGA_01515	ISArsp14_aa5	Ga0254970_10324	ISArsp14_aa11
2502877941	ISSis4	2554138311	ISArsp14_aa5	Myr02_00387	TnBth2_aa1	EIGBGHOE_01237	ISHasp2_aa2	WP_110368656.1	ISC1225_aa1	WP_054837210.1	ISC1058_aa1	WP_110368656.1	ISC1225_aa1	2502895653	ISSto13_aa2	2502877941	ISSis4_aa1	JBPJAKGA_01519	ISAcba1_aa2	Ga0254970_10326	ISArsp14_aa5
2502877942	ISSis4	2554138338	ISAcba1_aa2	Myr02_00445	ISSto13_aa2	EIGBGHOE_01268	ISC1904_aa2	WP_110368657.1	ISArsp14_aa11	WP_054837233.1	ISC1174_aa1	WP_110368657.1	ISArsp14_aa11	2502895654	ISC1913_aa2	2502877942	ISSis4_aa1	JBPJAKGA_01522	ISStma11_aa2	Ga0254970_10332	ISC1316_aa1
2502877946	ISC1926	2554138341	ISStma11_aa2	Myr02_00447	ISSis7_aa1	EIGBGHOE_01282	ISTvo5_aa2	WP_110368662.1	ISC1439A_aa1	WP_054837241.1	ISSto9_aa1	WP_110368662.1	ISC1439A_aa1	2502895667	ISC1926_aa2	2502877946	ISC1926_aa1	JBPJAKGA_01617	ISArsp14_aa11	Ga0254970_10333	ISC1316_aa1
2502877954	ISArsp14	2554138381	ISC1913_aa2	Myr02_00455	TnBth2_aa5	EIGBGHOE_01284	ISHsal13_aa2	WP_110368663.1	ISC1250_aa1	WP_054837244.1	ISArsp14_aa5	WP_110368663.1	ISC1250_aa1	2502895683	ISStma11_aa2	2502877954	ISArsp14_aa11	JBPJAKGA_01621	ISAcba1_aa3	Ga0254970_10334	ISC1316_aa1
2502877958	ISHru2	2554138390	ISArsp9_aa2	Myr02_00491	ISSis7_aa1	EIGBGHOE_01297	ISArsp14_aa5	WP_110368664.1	ISArsp14_aa5	WP_054837251.1	ISC1058_aa1	WP_110368664.1	ISArsp14_aa5	2502895706	ISSto9_aa1	2502877958	ISHru2_aa1	JBPJAKGA_01623	TnAs1_aa3	Ga0254970_10414	ISArsp14_aa5
2502877959	ISCco1	2554138396	ISSis6_aa1	Myr02_00517	IS231K_aa3	EIGBGHOE_01380	ISTko2_aa2	WP_110368665.1	ISC1225_aa1	WP_054837287.1	ISPre3_aa4	WP_110368665.1	ISC1225_aa1	2502895739	ISSto12_aa2	2502877959	ISCco1_aa1	JBPJAKGA_01663	ISArsp14_aa5	Ga0254970_10415	ISArsp14_aa5
2502877960	ISHel1	2554138397	ISSis4_aa1	Myr02_00528	IS231K_aa3	EIGBGHOE_01383	ISArsp14_aa5	WP_110368676.1	ISArsp14_aa11	WP_054837299.1	ISSis7_aa2	WP_110368676.1	ISArsp14_aa11	2502895788	IS1921_aa2	2502877960	ISHel1_aa2	JBPJAKGA_01665	ISArsp14_aa6	Ga0254970_104110	ISSto9_aa1
2502877968	ISMye1	2554138406	ISC1926_aa2	Myr02_00555	ISSis4_aa1	EIGBGHOE_01401	ISArsp14_aa5	WP_110368712.1	ISC1332_aa1	WP_054837306.1	ISCco2_aa3	WP_110368712.1	ISC1332_aa1	2502895789	IS1921_aa2	2502877968	ISMye1_aa1	JBPJAKGA_01766	ISArsp14_aa5	Ga0254970_104112	ISSto9_aa1
2502877969	ISMye1	2554138409	ISC1913_aa2	Myr02_00559	ISC1058_aa1	EIGBGHOE_01402	ISArsp14_aa5	WP_110368725.1	ISHarch16_aa1	WP_054837367.1	ISC1439A_aa1	WP_110368725.1	ISHarch16_aa1	2502895833	ISSis4_aa1	2502877969	ISMye1_aa1	JBPJAKGA_01817	ISArsp14_aa5	Ga0254970_104213	ISSis1_aa1
2502877979	ISSis1	2554138422	ISMye2_aa1	Myr02_00563	ISC1926_aa2	EIGBGHOE_01422	ISShes11_aa3	WP_110368728.1	TnAs1_aa3	WP_054837373.1	ISArsp14_aa5	WP_110368728.1	TnAs1_aa3	2502895847	ISStma11_aa2	2502877979	ISSis1_aa1	JBPJAKGA_01818	ISArsp14_aa5	Ga0254970_104216	ISSis1_aa1
2502877981	ISC1316	2554138427	ISStma11_aa2	Myr02_00570	ISMye1_aa1	EIGBGHOE_01424	ISTsi3_aa2	WP_110368744.1	ISC1225_aa1	WP_054837374.1	ISArsp14_aa5	WP_110368744.1	ISC1225_aa1	2502895882	ISArsp9_aa2	2502877981	ISC1316_aa1	JBPJAKGA_01858	ISArsp9_aa10	Ga0254970_10439	ISC1926_aa2
2502878001	ISC1926	2554138428	ISAcba1_aa3	Myr02_00571	ISSis4_aa1	EIGBGHOE_01436	ISArsp9_aa2	WP_110368754.1	ISC1225_aa1	WP_054837406.1	ISC1229_aa1	WP_110368754.1	ISC1225_aa1	2502895896	ISC1913_aa2	2502878001	ISC1926_aa2	JBPJAKGA_01860	TnAs1_aa4	Ga0254970_104312	ISC1316_aa1
2502878007	ISC1205	2554138429	ISSto12_aa2	Myr02_00576	ISArsp14_aa5	EIGBGHOE_01476	IS1921_aa2	WP_110368755.1	ISC1290_aa1	WP_054837428.1	ISArsp14_aa5	WP_110368755.1	ISC1290_aa1	2502895897	ISC1913_aa1	2502878007	ISC1205_aa1	JBPJAKGA_01874	TnAs1_aa3	Ga0254970_104313	ISC796_aa1
2502878030	ISMye1	2554138433	ISC1904_aa1	Myr02_00577	ISArsp14_aa5	EIGBGHOE_01484	ISCco2_aa3	WP_110368760.1	ISStma11_aa2	WP_054837438.1	ISArsp14_aa9	WP_110368760.1	ISStma11_aa2	2502895916	ISSto13_aa2	2502878030	ISMye1_aa1	JBPJAKGA_01878	TnAs1_aa3	Ga0254970_10444	IS1921_aa1
2502878035	ISSis3	2554138434	ISSis5_aa1	Myr02_00580	ISSis5_aa2	EIGBGHOE_01485	ISC1904_aa2	WP_110368763.1	IS5564_aa1	WP_054837477.1	IS1921_aa2	WP_110368763.1	IS5564_aa1	2502895921	TnAs1_aa3	2502878035	ISSis3_aa1	JBPJAKGA_01899	ISArsp14_aa11	Ga0254970_10445	IS1921_aa1
2502878062	ISC1316	2554138438	ISSis5_aa1	Myr02_00613	TnAs1_aa4	EIGBGHOE_01530	ISArsp14_aa5	WP_110368765.1	ISArsp9_aa5	WP_054837514.1	ISSis7_aa1	WP_110368765.1	ISArsp9_aa5	2502895944	ISArsp14_aa5	2502878062	ISC1316_aa1	JBPJAKGA_01977	TnBth2_aa1	Ga0254970_10446	ISSis5_aa1
2502878064	ISC1316	2554138439	ISSis7_aa1	Myr02_00627	ISSto12_aa2	EIGBGHOE_01574	ISAcba1_aa2	WP_110368767.1	ISArsp14_aa5	WP_054837538.1	ISC1250_aa1	WP_110368767.1	ISArsp14_aa5	2502895969	IS231K_aa3	2502878064	ISC1316_aa1	JBPJAKGA_01999	TnBth2_aa1	Ga0254970_10447	ISSis5_aa2
2502878066	ISC1926	2554138440	IS1921_aa2	Myr02_00635	ISC1926_aa2	EIGBGHOE_01592	ISArsp14_aa11	WP_110368786.1	ISC1316_aa1	WP_054837545.1	ISSis4_aa1	WP_110368786.1	ISC1316_aa1	2502896015	ISSis4_aa1	2502878066	ISC1926_aa1	JBPJAKGA_02005	ISArsp14_aa5	Ga0254970_10452	ISArsp14_aa5
2502878067	ISC1913	2554138441	ISSis5_aa2	Myr02_00648	ISStma11_aa2	EIGBGHOE_01615	ISC1904_aa2	WP_110368787.1	ISSis2_aa2	WP_054837549.1	ISC1078_aa1	WP_110368787.1	ISSis2_aa2	2502896058	ISC1290_aa1	2502878067	ISC1913_aa1	JBPJAKGA_02023	ISTvo5_aa1	Ga0254970_104514	ISSto1_aa2
2502878068	ISC1926	2554138448	ISC1926_aa2	Myr02_00650	IS231K_aa3	EIGBGHOE_01620	ISArsp14_aa5	WP_110368790.1	ISC1225_aa1	WP_054837565.1	ISSis4_aa1	WP_110368790.1	ISC1225_aa1	2502896158	ISSis6_aa1	2502878068	ISC1926_aa2	JBPJAKGA_02024	ISSto1_aa2	Ga0254970_10471	ISArsp14_aa5
2502878069	ISC1926	2554138454	ISSis1_aa1	Myr02_00656	ISC1926_aa2	EIGBGHOE_01646	ISTsi1_aa2	WP_110368810.1	ISC1290_aa1	WP_054837566.1	ISArsp14_aa11	WP_110368810.1	ISC1290_aa1	2502896159	ISC1205_aa1	2502878069	ISC1926_aa2	JBPJAKGA_02058	ISBsu3_aa2	Ga0254970_10472	ISArsp14_aa5
2502878081	ISArsp14	2554138455	ISSto12_aa2	Myr02_00659	ISSis2_aa2	EIGBGHOE_01675	ISArsp14_aa5	WP_110368811.1	ISSis4_aa1	WP_054837572.1	ISC1250_aa1	WP_110368811.1	ISSis4_aa1	2502896166	ISArsp14_aa9	2502878081	ISArsp14_aa5	JBPJAKGA_02087	ISC1174_aa1	Ga0254970_10479	ISArsp14_aa5
2502878088	TnBth2	2554138461	ISSto9_aa1	Myr02_00663	ISNhu1_aa2	EIGBGHOE_01701	ISArsp9_aa4	WP_110368817.1	ISC1290_aa1	WP_054837576.1	ISSto6_aa1	WP_110368817.1	ISC1290_aa1	2502896186	ISMye1_aa1	2502878088	TnBth2_aa1	JBPJAKGA_02094	ISC1904_aa1	Ga0254970_10499	TnBth2_aa4
2502878095	ISC1904	2554138465	ISC1316_aa1	Myr02_00672	ISSto12_aa2	EIGBGHOE_01716	IS231K_aa3	WP_110368821.1	ISC1332_aa1	WP_054837577.1	ISC1212_aa2	WP_110368821.1	ISC1332_aa1	2502896214	ISSto12_aa2	2502878095	ISC1904_aa2	JBPJAKGA_02095	ISSto11_aa1	Ga0254970_10502	ISC1926_aa1
2502878111	ISArsp9	2554138476	ISC1926_aa2	Myr02_00696	ISSis4_aa1	EIGBGHOE_01772	TnAs1_aa3	WP_110368822.1	ISC1212_aa2	WP_054837591.1	ISC1250_aa1	WP_110368822.1	ISC1212_aa2	2502896260	TnBth2_aa1	2502878111	ISArsp9_aa2	JBPJAKGA_02098	ISC1250_aa1	Ga0254970_10516	TnBth2_aa1
2502878114	ISArsp9	2554138482	ISArsp14_aa5	Myr02_00704	ISStma11_aa2	EIGBGHOE_01851	ISTsi1_aa2	WP_110368824.1	ISHp1_aa2	WP_054837594.1	ISHall1_aa2	WP_110368824.1	ISHp1_aa2	2502896267	ISC1904_aa2	2502878114	ISArsp9_aa6			Ga0254970_10521	TnBth2_aa1
2502878118	ISSto11	2554138523	ISArsp14_aa5	Myr02_00743	ISSis5_aa2	EIGBGHOE_01872	ISStma11_aa2	WP_110368849.1	ISArsp14_aa5	WP_054837597.1	ISC1332_aa1	WP_110368849.1	ISArsp14_aa5	2502896308	ISArsp14_aa5	2502878118	ISSto11_aa1			Ga0254970_105311	ISC1316_aa1
2502878119	ISSis7	2554138527	ISArsp14_aa5	Myr02_00744	ISSis7_aa1	EIGBGHOE_01881	TnBth2_aa1	WP_110368864.1	ISStma11_aa2	WP_054837598.1	ISTko2_aa2	WP_110368864.1	ISStma11_aa2	2502896310	ISSis5_aa2	2502878119	ISSis7_aa1			Ga0254970_105710	ISArsp14_aa5
2502878135	ISC1316	2554138528	ISSto13_aa2	Myr02_00750	ISSis5_aa1	EIGBGHOE_01888	ISArsp14_aa5	WP_110368870.1	ISC1439A_aa1	WP_054837599.1	ISC1212_aa2	WP_110368870.1	ISC1439A_aa1	2502896311	ISSto11_aa2	2502878135	ISC1316_aa1			Ga0254970_105711	ISArsp14_aa5
2502878138	ISC1316	2554138538	ISC1316_aa1	Myr02_00751	ISC796_aa1	EIGBGHOE_01965	ISArsp14_aa11	WP_110368883.1	ISHel1_aa2			WP_110368883.1	ISHel1_aa2	2502896312	ISSis5_aa2	2502878138	ISC1316_aa1			Ga0254970_10588	ISArsp14_aa5
2502878155	ISMye1	2554138541	ISC1926_aa2	Myr02_00758	ISSto12_aa2	EIGBGHOE_01968	ISStma11_aa2	WP_110368903.1	ISSto12_aa2			WP_110368903.1	ISSto12_aa2	2502896344	ISC1926_aa2	2502878155	ISMye1_aa1			Ga0254970_10589	ISArsp14_aa5
2502878156	ISMye1	2554138551	TnAs1_aa3	Myr02_00766	ISArsp14_aa5	EIGBGHOE_01988	ISArsp14_aa11	WP_110368942.1	ISArsp14_aa5			WP_110368942.1	ISArsp14_aa5	2502896394	ISC1926_aa2	2502878156	ISMye1_aa1			Ga0254970_10592	ISC1904_aa2
2502878158	ISMye1	2554138555	TnBth2_aa1	Myr02_00780	ISMye1_aa1	EIGBGHOE_01994	ISStma11_aa2	WP_110368945.1	ISArsp14_aa5			WP_110368945.1	ISArsp14_aa5	2502896402	ISC1913_aa2	2502878158	ISMye1_aa1			Ga0254970_105911	ISC1316_aa1
2502878165	ISSto12	2554138569	ISSis4_aa1	Myr02_00781	ISMye1_aa1	EIGBGHOE_02002	ISArsp9_aa2	WP_110368946.1	ISC1250_aa1			WP_110368946.1	ISC1250_aa1	2502896433	ISC1926_aa2	2502878165	ISSto12_aa2			Ga0254970_10601	ISArsp14_aa5
2502878167	ISAcba1	2554138578	ISC1904_aa1	Myr02_00787	ISC1926_aa2	EIGBGHOE_02004	ISArsp9_aa6	WP_110368955.1	ISShes11_aa3			WP_110368955.1	ISShes11_aa3	2502896440	ISSto12_aa1	2502878167	ISAcba1_aa3			Ga0254970_10602	ISArsp14_aa5
2502878169	ISStma11	2554138586	IS231K_aa3	Myr02_00789	ISSto13_aa2	EIGBGHOE_02040	ISAcba1_aa2	WP_110368968.1	ISArsp9_aa2			WP_110368968.1	ISArsp9_aa2	2502896441	ISSto12_aa1	2502878169	ISStma11_aa2			Ga0254970_10607	ISSto9_aa1
2502878214	ISSto9	2554138597	ISMye1_aa1	Myr02_00811	ISSto12_aa2	EIGBGHOE_02042	ISArsp14_aa11	WP_110368973.1	ISArsp9_aa6			WP_110368973.1	ISArsp9_aa6	2502896442	ISSto12_aa1	2502878214	ISSto9_aa1			Ga0254970_10608	ISSto9_aa1
2502878222	ISSto12	2554138606	ISC1316_aa1	Myr02_00813	ISSis5_aa2	EIGBGHOE_02053	ISTsi1_aa2	WP_110368999.1	ISC1048_aa1			WP_110368999.1	ISC1048_aa1	2502896446	ISSto12_aa2	2502878222	ISSto12_aa2			Ga0254970_106011	ISSto13_aa2
2502878232	ISSis4	2554138615	ISC1926_aa2	Myr02_00826	ISArsp14_aa5	EIGBGHOE_02065	ISTvo5_aa2	WP_110369000.1	ISC1048_aa1			WP_110369000.1	ISC1048_aa1	2502896469	ISSis4_aa1	2502878232	ISSis4_aa1			Ga0254970_10626	ISC1926_aa2
2502878233	ISC1205	2554138632	ISC1205_aa1	Myr02_00827	ISSto12_aa2	EIGBGHOE_02075	ISTvo5_aa2	WP_110369033.1	ISSis4_aa1			WP_110369033.1	ISSis4_aa1	2502896470	ISSis4_aa1	2502878233	ISC1205_aa1			Ga0254970_10628	ISSce1_aa2
2502878242	ISSis4	2554138649	ISArsp14_aa5	Myr02_00828	ISC1316_aa1	EIGBGHOE_02183	ISC1904_aa2	WP_110369045.1	ISAcba1_aa2			WP_110369045.1	ISAcba1_aa2	2502896514	ISSis7_aa1	2502878242	ISSis4_aa1			Ga0254970_10661	ISC1316_aa1
2502878257	ISSto12	2554138669	ISSto12_aa2	Myr02_00833	ISSis2_aa1	EIGBGHOE_02201	ISStma11_aa2	WP_110369049.1	ISAcba1_aa2			WP_110369049.1	ISAcba1_aa2	2502896534	IS231K_aa3	2502878257	ISSto12_aa2			Ga0254970_10687	ISArsp14_aa5
2502878275	ISC1316	2554138677	ISArsp9_aa5	Myr02_00839	ISArsp9_aa2	EIGBGHOE_02209	ISArsp9_aa5	WP_110369083.1	ISArsp14_aa5			WP_110369083.1	ISArsp14_aa5	2502896555	ISSto12_aa2	2502878275	ISC1316_aa1			Ga0254970_10717	ISArsp9_aa4
2502878276	ISC1316	2554138680	IS1921_aa1	Myr02_00849	ISC1913_aa2	EIGBGHOE_02212	ISArsp14_aa11	WP_110369118.1	ISArsp14_aa5			WP_110369118.1	ISArsp14_aa5	2502896562	IS231K_aa3	2502878276	ISC1316_aa1			Ga0254970_10725	ISArsp14_aa5
2502878277	ISC1316	2554138681	ISMye1_aa1	Myr02_00850	ISC1913_aa1	EIGBGHOE_02214	ISSis7_aa1	WP_110369135.1	ISC1439A_aa1			WP_110369135.1	ISC1439A_aa1	2502896569	ISSis4_aa1	2502878277	ISC1316_aa1			Ga0254970_10726	ISArsp14_aa5
2502878304	ISSto12	2554138699	ISSto12_aa2	Myr02_00852	ISC1926_aa2	EIGBGHOE_02216	ISC1904_aa2	WP_110369136.1	ISC1439A_aa1			WP_110369136.1	ISC1439A_aa1	2502896574	ISSto12_aa2	2502878304	ISSto12_aa2			Ga0254970_10748	ISC1225_aa1
2502878305	ISSto12	2554138712	ISArsp14_aa5	Myr02_00889	IS231K_aa3	EIGBGHOE_02250	TnAs1_aa3	WP_110369138.1	ISC1250_aa1			WP_110369138.1	ISC1250_aa1	2502896575	ISSto12_aa2	2502878305	ISSto12_aa2			Ga0254970_10767	ISC1316_aa1
2502878306	ISSto12	2554138713	ISArsp14_aa5	Myr02_00910	ISC1926_aa2	EIGBGHOE_02262	ISC1904_aa2	WP_110369173.1	IS231K_aa3			WP_110369173.1	IS231K_aa3	2502896582	ISStma11_aa2	2502878306	ISSto12_aa2			Ga0254970_10792	ISArsp14_aa5
2502878307	ISSto12	2554138717	ISSto1_aa2	Myr02_00926	TnAs1_aa3	EIGBGHOE_02330	ISSis7_aa1	WP_110369187.1	ISC1332_aa1			WP_110369187.1	ISC1332_aa1	2502896610	ISArsp14_aa5	2502878307	ISSto12_aa1			Ga0254970_10793	ISArsp14_aa5
2502878315	ISSto12	2554138718	IS1921_aa1	Myr02_00930	ISSis4_aa1	EIGBGHOE_02331	ISC1904_aa2	WP_110369191.1	ISArsp14_aa5			WP_110369191.1	ISArsp14_aa5	2502896612	ISArsp14_aa5	2502878315	ISSto12_aa2			Ga0254970_10794	ISSto9_aa1
2502878317	ISShes11	2554138727	ISSto12_aa2	Myr02_00932	ISSis7_aa1	EIGBGHOE_02346	ISDka2_aa2	WP_110369251.1	ISArsp14_aa5			WP_110369251.1	ISArsp14_aa5	2502896618	ISMye1_aa1	2502878317	ISShes11_aa3			Ga0254970_10858	ISArsp14_aa5
2502878318	ISSto12	2554138735	ISSto12_aa2	Myr02_00937	ISSto12_aa2			WP_110369260.1	ISArsp14_aa9			WP_110369260.1	ISArsp14_aa9	2502896620	ISMye1_aa1	2502878318	ISSto12_aa2			Ga0254970_10902	ISSte1_aa1
2502878321	ISSis4	2554138748	ISMye1_aa1	Myr02_00939	ISArsp9_aa4			WP_110369297.1	TnBth2_aa1			WP_110369297.1	TnBth2_aa1	2502896630	ISSis5_aa2	2502878325	ISMye1_aa1			Ga0254970_10912	ISCco2_aa3
2502878325	ISMye1	2554138749	ISMye1_aa1	Myr02_00954	ISC1217_aa1			WP_110369306.1	ISArsp14_aa11			WP_110369306.1	ISArsp14_aa11	2502896635	ISSto12_aa2	2502878327	ISMye1_aa1			Ga0254970_10941	TnAs1_aa3
2502878327	ISMye1	2554138750	ISSis5_aa2	Myr02_00959	ISC1926_aa2			WP_110369326.1	ISStma11_aa2			WP_110369326.1	ISStma11_aa2	2502896647	ISArsp14_aa11	2502878339	ISSis7_aa1			Ga0254970_10953	ISC1316_aa1
2502878339	ISSis7	2554138751	ISSis5_aa2	Myr02_00962	ISC1926_aa2			WP_110369342.1	ISStma11_aa2			WP_110369342.1	ISStma11_aa2	2502896660	ISC1205_aa1	2502878340	ISSis5_aa2			Ga0254970_10954	ISCaje5_aa2
2502878340	ISSis5	2554138758	IS1921_aa2	Myr02_00964	ISC1926_aa2			WP_110369402.1	ISArsp14_aa5			WP_110369402.1	ISArsp14_aa5	2502896661	ISSis4_aa1	2502878341	ISSis5_aa2			Ga0254970_11001	ISC1316_aa1
2502878341	ISSis5	2554138787	ISSis4_aa1	Myr02_00994	ISSis4_aa1			WP_110369403.1	ISArsp14_aa5			WP_110369403.1	ISArsp14_aa5	2502896662	ISC1205_aa1	2502878362	ISSis5_aa2			Ga0254970_110211	ISStma11_aa2
2502878362	ISSis5	2554138792	ISSto12_aa2	Myr02_00995	ISSis4_aa1			WP_110369412.1	ISC1250_aa1			WP_110369412.1	ISC1250_aa1	2502896704	ISC1217_aa1	2502878365	ISSis5_aa2			Ga0254970_110214	ISC1200_aa1
2502878365	ISSis5	2554138793	ISArsp14_aa6	Myr02_01002	ISArsp14_aa5			WP_110369414.1	ISC1048_aa1			WP_110369414.1	ISC1048_aa1	2502896706	ISMye2_aa1	2502878377	ISMye1_aa1			Ga0254970_11048	ISHce1_aa4
2502878377	ISMye1	2554138795	ISArsp14_aa5	Myr02_01006	ISArsp14_aa5			WP_110369415.1	ISC1048_aa1			WP_110369415.1	ISC1048_aa1	2502896716	ISC1926_aa2	2502878378	ISMye1_aa1			Ga0254970_110411	ISSis6_aa1
2502878378	ISMye1	2554138797	ISMye1_aa1	Myr02_01007	ISC1913_aa2			WP_110369416.1	ISC1332_aa1			WP_110369416.1	ISC1332_aa1	2502896763	ISSto12_aa2	2502878379	ISMye1_aa1			Ga0254970_11059	ISArsp14_aa5
2502878379	ISMye1	2554138808	ISSis7_aa2	Myr02_01010	ISC1926_aa2			WP_110369418.1	ISC1250_aa1			WP_110369418.1	ISC1250_aa1	2502896842	ISSto12_aa2	2502878383	ISMye1_aa1			Ga0254970_110510	ISSto9_aa1
2502878383	ISMye1	2554138825	ISSto12_aa2	Myr02_01019	ISSto12_aa2			WP_110369439.1	IS4811_aa4			WP_110369439.1	IS4811_aa4	2502896850	ISArsp14_aa5	2502878384	ISMye1_aa1			Ga0254970_110511	ISSto9_aa1
2502878384	ISMye1	2554138835	ISC1926_aa2	Myr02_01026	ISSto12_aa2			WP_110369445.1	TnBth2_aa1			WP_110369445.1	TnBth2_aa1	2502896889	ISSto12_aa2	2502878385	ISMye1_aa1			Ga0254970_110631	ISC1225_aa1
2502878385	ISMye1			Myr02_01048	ISC1926_aa1			WP_110369447.1	TnAs1_aa3			WP_110369447.1	TnAs1_aa3	2502896922	ISSis7_aa1	2502878427	ISC1205_aa1			Ga0254970_110632	ISC1225_aa1
2502878427	ISC1205			Myr02_01049	ISC1926_aa2			WP_110369494.1	ISShvi3_aa1			WP_110369494.1	ISShvi3_aa1	2502896923	ISSto11_aa1	2502878428	ISSis4_aa1			Ga0254970_110723	TnAs1_aa3
2502878428	ISSis4			Myr02_01050	ISSto12_aa2			WP_110369502.1	ISArsp14_aa5			WP_110369502.1	ISArsp14_aa5	2502896929	ISArsp9_aa6	2502878439	ISSis5_aa2			Ga0254970_11083	ISMno23_aa1
2502878439	ISSis5			Myr02_01056	ISArsp14_aa5			WP_110369513.1	ISC1439A_aa1			WP_110369513.1	ISC1439A_aa1	2502896933	ISArsp9_aa2	2502878443	ISArsp14_aa5			Ga0254970_11089	ISArsp14_aa5
2502878443	ISArsp14			Myr02_01059	ISSto12_aa2			WP_110369522.1	ISC1225_aa1			WP_110369522.1	ISC1225_aa1	2502896956	Tn4430_aa1	2502878475	ISStma11_aa2			Ga0254970_110848	ISC1926_aa2
2502878475	ISStma11			Myr02_01077	ISSis6_aa1			WP_110369523.1	ISHarch16_aa1			WP_110369523.1	ISHarch16_aa1	2502896972	ISC1926_aa2	2502878518	ISSis5_aa2			Ga0254970_11098	ISArsp14_aa5
2502878518	ISSis5			Myr02_01080	ISMye1_aa1			WP_110369531.1	ISStma11_aa2			WP_110369531.1	ISStma11_aa2	2502897003	ISSto12_aa2	2502878550	ISArsp14_aa5			Ga0254970_110911	ISArsp14_aa5
2502878550	ISArsp14			Myr02_01084	ISArsp14_aa5			WP_110369534.1	ISSis7_aa2			WP_110369534.1	ISSis7_aa2	2502897004	ISSis4_aa1	2502878571	ISSto13_aa2			Ga0254970_110928	ISArsp14_aa5
2502878571	ISSto13			Myr02_01085	ISArsp14_aa5			WP_110369541.1	IS231K_aa3			WP_110369541.1	IS231K_aa3	2502897010	ISSis4_aa1	2502878588	ISHce1_aa4			Ga0254970_111018	ISArsp14_aa5
2502878588	ISHce1			Myr02_01091	TnShfr1_aa3			WP_110369552.1	ISArsp9_aa10			WP_110369552.1	ISArsp9_aa10	2502897011	ISSis4_aa1	2502878626	ISC1926_aa2			Ga0254970_11115	ISArsp14_aa5
2502878626	ISC1926			Myr02_01109	ISSis4_aa1			WP_110369587.1	ISC1250_aa1			WP_110369587.1	ISC1250_aa1	2502897014	ISC1316_aa1	2502878635	ISSto12_aa2			Ga0254970_111131	ISC1316_aa1
2502878635	ISSto12			Myr02_01113	ISC1926_aa1			WP_110369601.1	ISC1234_aa1			WP_110369601.1	ISC1234_aa1	2502897018	ISC1316_aa1	2502878648	ISSis4_aa1			Ga0254970_11122	ISArsp14_aa5
2502878648	ISSis4			Myr02_01120	ISArsp14_aa11			WP_110369628.1	ISC1332_aa1			WP_110369628.1	ISC1332_aa1	2502897026	ISSis4_aa1	2502878660	ISSto12_aa2			Ga0254970_11126	ISC1316_aa1
2502878660	ISSto12			Myr02_01124	ISHru2_aa1			WP_110369629.1	ISTsi1_aa2			WP_110369629.1	ISTsi1_aa2	2502897027	ISC1205_aa1	2502878661	ISSto12_aa2			Ga0254970_11127	ISC1316_aa1
2502878661	ISSto12			Myr02_01125	ISCsa5_aa1			WP_110369632.1	ISArsp14_aa11			WP_110369632.1	ISArsp14_aa11	2502897035	ISAcba1_aa2	2502878662	ISSis5_aa2			Ga0254970_11128	ISC1316_aa1
2502878662	ISSis5			Myr02_01126	ISHel1_aa2			WP_110369646.1	ISArsp14_aa11			WP_110369646.1	ISArsp14_aa11	2502897075	ISSis4_aa1	2502878663	ISSis5_aa2			Ga0254970_111217	ISC796_aa1
2502878663	ISSis5			Myr02_01133	ISMye1_aa1			WP_110369647.1	ISArsp14_aa5			WP_110369647.1	ISArsp14_aa5	2502897077	TnBth2_aa1	2502878664	ISSto11_aa1			Ga0254970_111218	ISSto9_aa1
2502878664	ISSto11			Myr02_01134	ISMye1_aa1			WP_110369650.1	ISC1359_aa1			WP_110369650.1	ISC1359_aa1	2502897081	TnAs1_aa3	2502878665	ISSis5_aa1			Ga0254970_111219	ISSto9_aa1
2502878665	ISSis5			Myr02_01144	ISSto12_aa2			WP_110369654.1	ISC1316_aa1			WP_110369654.1	ISC1316_aa1	2502897088	ISSis4_aa1	2502878678	ISMye1_aa1			Ga0254970_111220	ISSto9_aa1
2502878678	ISMye1			Myr02_01145	ISC1316_aa1			WP_110369655.1	ISC1234_aa1			WP_110369655.1	ISC1234_aa1	2502897096	ISArsp14_aa11	2502878679	ISMye1_aa1			Ga0254970_11136	ISArsp14_aa5
2502878679	ISMye1			Myr02_01161	ISC1926_aa2			WP_110369669.1	ISC1250_aa1			WP_110369669.1	ISC1250_aa1	2502897097	ISC1316_aa1	2502878684	ISSis4_aa1			Ga0254970_111320	ISArsp14_aa5
2502878684	ISSis4			Myr02_01176	ISC1316_aa1			WP_110369670.1	ISC1250_aa1			WP_110369670.1	ISC1250_aa1	2502897104	ISArsp14_aa6	2502878704	ISMye1_aa1			Ga0254970_111321	ISArsp14_aa6
2502878704	ISMye1			Myr02_01177	ISC1926_aa1			WP_110369680.1	ISC1048_aa1			WP_110369680.1	ISC1048_aa1	2502897105	ISSto12_aa2	2502878710	ISSto12_aa2			Ga0254970_111420	ISCco2_aa3
2502878710	ISSto12			Myr02_01178	ISC1913_aa1			WP_110369689.1	ISC1316_aa1			WP_110369689.1	ISC1316_aa1	2502897125	ISSto12_aa2	2502878738	ISSto12_aa2			Ga0254970_111517	IS231K_aa3
2502878738	ISSto12			Myr02_01179	ISC1926_aa2			WP_110369695.1	ISC1212_aa1			WP_110369695.1	ISC1212_aa1	2502897144	ISSto12_aa2	2502878768	ISArsp9_aa5			Ga0254970_111713	ISC1904_aa2
2502878768	ISArsp9			Myr02_01180	ISC1926_aa2			WP_110369702.1	ISC1439A_aa1			WP_110369702.1	ISC1439A_aa1	2502897167	ISSis4_aa1	2502878771	IS1921_aa1			Ga0254970_111714	IS1921_aa2
2502878771	IS1921			Myr02_01184	ISSis5_aa1			WP_110369703.1	ISC1212_aa1			WP_110369703.1	ISC1212_aa1	2502897169	ISMye1_aa1	2502878772	ISSis5_aa1			Ga0254970_111715	ISSis7_aa2
2502878772	ISSis5			Myr02_01190	ISArsp14_aa5			WP_110369712.1	ISC1174_aa1			WP_110369712.1	ISC1174_aa1	2502897175	ISC1316_aa1	2502878773	ISSis7_aa1			Ga0254970_11187	ISArsp14_aa5
2502878773	ISSis7			Myr02_01196	TnBth2_aa1			WP_110369717.1	ISC1439A_aa1			WP_110369717.1	ISC1439A_aa1	2502897194	ISArsp14_aa5	2502878774	ISSis5_aa2			Ga0254970_11188	ISArsp14_aa5
2502878774	ISSis5			Myr02_01203	ISC1904_aa2			WP_110369724.1	ISC1212_aa1			WP_110369724.1	ISC1212_aa1	2502897199	ISSis5_aa2	2502878775	ISSto11_aa2			Ga0254970_112020	ISC1926_aa2
2502878775	ISSto11			Myr02_01217	ISC1205_aa1			WP_110369725.1	ISC1212_aa2			WP_110369725.1	ISC1212_aa2	2502897225	ISArsp14_aa5	2502878776	ISSis5_aa2			Ga0254970_11223	ISArsp14_aa11
2502878776	ISSis5			Myr02_01238	ISMye1_aa1			WP_110369768.1	ISBsu3_aa2			WP_110369768.1	ISBsu3_aa2	2502897226	ISArsp14_aa5	2502878777	ISArsp14_aa11			Ga0254970_11233	ISArsp14_aa5
2502878777	ISArsp14			Myr02_01243	ISSis3_aa1			WP_110369781.1	ISHce1_aa4			WP_110369781.1	ISHce1_aa4	2502897227	ISArsp14_aa5	2502878779	TnAs1_aa3			Ga0254970_11234	ISSis1_aa1
2502878779	TnAs1			Myr02_01260	ISArsp9_aa2			WP_110369813.1	TnBth2_aa4			WP_110369813.1	TnBth2_aa4	2502897228	ISArsp14_aa5	2502878787	ISSto12_aa2			Ga0254970_112416	ISArsp14_aa5
2502878787	ISSto12			Myr02_01263	ISArsp9_aa6			WP_110369814.1	ISC1316_aa1			WP_110369814.1	ISC1316_aa1			2502878788	ISSto12_aa2			Ga0254970_112719	ISSis5_aa1
2502878788	ISSto12			Myr02_01265	ISSto11_aa1			WP_110369840.1	ISSis2_aa2			WP_110369840.1	ISSis2_aa2			2502878790	ISStma11_aa2			Ga0254970_112720	ISSis7_aa1
2502878790	ISStma11			Myr02_01266	ISSis7_aa1			WP_110369861.1	ISSis4_aa1			WP_110369861.1	ISSis4_aa1			2502878803	ISSis4_aa1			Ga0254970_112721	ISC1316_aa1
2502878803	ISSis4			Myr02_01278	ISSto12_aa2											2502878804	TnBth2_aa1			Ga0254970_112722	IS1921_aa2
2502878804	TnBth2			Myr02_01284	ISMye1_aa1											2502878861	ISAcba1_aa2			Ga0254970_11324	ISArsp14_aa11
2502878861	ISAcba1			Myr02_01285	ISMye1_aa1											2502878876	ISSis6_aa1			Ga0254970_11326	ISArsp14_aa5
2502878876	ISSis6			Myr02_01290	ISAcba1_aa3											2502878882	ISSis7_aa1			Ga0254970_11332	ISC1316_aa1
2502878882	ISSis7			Myr02_01291	ISStma11_aa2											2502878883	ISSis5_aa2			Ga0254970_11333	ISC1316_aa1
2502878883	ISSis5			Myr02_01332	ISMye1_aa1											2502878893	ISSis2_aa2			Ga0254970_11334	ISC1316_aa1
2502878893	ISSis2			Myr02_01333	ISMye1_aa1											2502878894	ISDka2_aa2			Ga0254970_11414	ISArsp14_aa5
2502878894	ISDka2			Myr02_01334	ISMye1_aa1											2502878897	ISSis6_aa1			Ga0254970_11415	ISArsp14_aa5
2502878897	ISSis6			Myr02_01338	ISMye1_aa1											2502878898	ISSis6_aa1			Ga0254970_114110	ISSto9_aa1
2502878898	ISSis6			Myr02_01339	ISMye1_aa1											2502878928	ISArsp14_aa11			Ga0254970_114112	ISSto9_aa1
2502878928	ISArsp14			Myr02_01372	ISSis7_aa1											2502878944	ISHaca1_aa2			Ga0254970_114213	ISSis1_aa1
2502878944	ISHaca1			Myr02_01373	ISSis5_aa2											2502878952	ISSis4_aa1			Ga0254970_114216	ISSis1_aa1
2502878952	ISSis4			Myr02_01376	ISC1926_aa2											2502878953	ISC1205_aa1			Ga0254970_11439	ISC1926_aa2
2502878953	ISC1205			Myr02_01392	ISSis5_aa2											2502878961	ISSto12_aa2			Ga0254970_114312	ISC1316_aa1
2502878961	ISSto12			Myr02_01413	ISStma11_aa2											2502878965	ISC1926_aa2			Ga0254970_114313	ISC796_aa1
2502878965	ISC1926			Myr02_01441	ISC1205_aa1											2502878978	ISSis4_aa1			Ga0254970_11444	IS1921_aa1
2502878978	ISSis4			Myr02_01451	ISArsp14_aa5											2502878985	ISSis5_aa1			Ga0254970_11445	IS1921_aa1
2502878985	ISSis5			Myr02_01481	ISSis5_aa2											2502878986	ISSis7_aa1			Ga0254970_11446	ISSis5_aa1
2502878986	ISSis7			Myr02_01529	ISArsp14_aa5											2502879006	ISSto12_aa2			Ga0254970_11447	ISSis5_aa2
2502879006	ISSto12			Myr02_01536	ISC1316_aa1											2502879031	ISSto13_aa2			Ga0254970_11452	ISArsp14_aa5
2502879031	ISSto13			Myr02_01552	ISHce1_aa4											2502879033	ISSis7_aa1			Ga0254970_114514	ISSto1_aa2
2502879033	ISSis7			Myr02_01569	ISArsp14_aa11											2502879041	TnBth2_aa5			Ga0254970_11471	ISArsp14_aa5
2502879041	TnBth2			Myr02_01581	ISTac1_aa2											2502879078	ISSis7_aa1			Ga0254970_11472	ISArsp14_aa5
2502879078	ISSis7			Myr02_01582	ISHaca1_aa2											2502879105	IS231K_aa3			Ga0254970_11479	ISArsp14_aa5
2502879105	IS231K			Myr02_01583	ISSis5_aa2											2502879114	IS231K_aa3			Ga0254970_11499	TnBth2_aa4
2502879114	IS231K			Myr02_01584	ISSis5_aa2											2502879146	ISSis4_aa1			Ga0254970_11502	ISC1926_aa1
2502879146	ISSis4			Myr02_01585	ISSto11_aa1											2502879152	ISC1058_aa1			Ga0254970_11516	TnBth2_aa1
2502879152	ISC1058			Myr02_01586	ISSis5_aa1											2502879163	ISMye1_aa1			Ga0254970_11521	TnBth2_aa1
2502879163	ISMye1			Myr02_01595	ISMye1_aa1											2502879165	ISSis4_aa1			Ga0254970_115311	ISC1316_aa1
2502879165	ISSis4			Myr02_01596	ISMye1_aa1											2502879170	ISArsp14_aa5			Ga0254970_115710	ISArsp14_aa5
2502879170	ISArsp14			Myr02_01597	ISMye1_aa1											2502879171	ISArsp14_aa5			Ga0254970_115711	ISArsp14_aa5
2502879171	ISArsp14			Myr02_01600	ISSis4_aa1											2502879175	ISSis5_aa2			Ga0254970_11588	ISArsp14_aa5
2502879175	ISSis5			Myr02_01601	ISSis4_aa1											2502879220	ISSto12_aa2			Ga0254970_11589	ISArsp14_aa5
2502879220	ISSto12			Myr02_01630	ISSis4_aa1											2502879228	ISSto12_aa2			Ga0254970_11592	ISC1904_aa2
2502879228	ISSto12			Myr02_01641	ISSto12_aa2											2502879241	ISStma11_aa2			Ga0254970_115911	ISC1316_aa1
2502879241	ISStma11			Myr02_01642	ISSto12_aa2											2502879243	IS231K_aa3			Ga0254970_11601	ISArsp14_aa5
2502879243	IS231K			Myr02_01643	ISAcba1_aa2											2502879249	ISC1926_aa2			Ga0254970_11602	ISArsp14_aa5
2502879249	ISC1926			Myr02_01654	ISSis6_aa1											2502879256	ISSis2_aa2			Ga0254970_11607	ISSto9_aa1
2502879256	ISSis2			Myr02_01657	ISSis7_aa1											2502879260	ISNhu1_aa2			Ga0254970_11608	ISSto9_aa1
2502879260	ISNhu1			Myr02_01662	ISSis2_aa2											2502879268	ISSto12_aa2			Ga0254970_116011	ISSto13_aa2
2502879268	ISSto12			Myr02_01663	ISDka2_aa2											2502879295	ISSis4_aa1			Ga0254970_11626	ISC1926_aa2
2502879295	ISSis4			Myr02_01666	ISSis6_aa1											2502879307	ISStma11_aa2			Ga0254970_11628	ISSce1_aa2
2502879307	ISStma11			Myr02_01667	ISSis6_aa1											2502879351	ISSis5_aa2			Ga0254970_11661	ISC1316_aa1
2502879351	ISSis5			Myr02_01680	ISC1926_aa2											2502879352	ISSis7_aa1			Ga0254970_11687	ISArsp14_aa5
2502879352	ISSis7			Myr02_01686	ISC1926_aa2											2502879358	IS1921_aa1			Ga0254970_11717	ISArsp9_aa4
2502879358	IS1921			Myr02_01687	ISSto12_aa2											2502879359	ISC796_aa1			Ga0254970_11725	ISArsp14_aa5
2502879359	ISC796			Myr02_01688	ISArsp14_aa5											2502879368	ISSto12_aa2			Ga0254970_11726	ISArsp14_aa5
2502879368	ISSto12			Myr02_01694	ISC1926_aa2											2502879380	ISArsp14_aa5			Ga0254970_11748	ISC1225_aa1
2502879380	ISArsp14			Myr02_01707	ISSto12_aa2											2502879388	ISSto12_aa2			Ga0254970_11767	ISC1316_aa1
2502879388	ISSto12			Myr02_01710	ISDge18_aa1											2502879396	ISMye1_aa1			Ga0254970_11792	ISArsp14_aa5
2502879396	ISMye1			Myr02_01728	ISC1926_aa2											2502879398	ISC1926_aa2			Ga0254970_11793	ISArsp14_aa5
2502879398	ISC1926			Myr02_01781	ISSis4_aa1											2502879406	ISSto13_aa2			Ga0254970_11794	ISSto9_aa1
2502879406	ISSto13			Myr02_01783	ISC1926_aa2											2502879434	ISSto12_aa2			Ga0254970_11858	ISArsp14_aa5
2502879434	ISSto12			Myr02_01787	ISC1926_aa2											2502879436	ISC1926_aa2			Ga0254970_11902	ISSte1_aa1
2502879436	ISC1926			Myr02_01795	ISSis4_aa1											2502879437	ISSis5_aa2			Ga0254970_11912	ISCco2_aa3
2502879437	ISSis5			Myr02_01798	ISSis5_aa1											2502879442	ISSis5_aa2			Ga0254970_11941	TnAs1_aa3
2502879442	ISSis5			Myr02_01799	ISSis7_aa1											2502879451	ISArsp14_aa5			Ga0254970_11953	ISC1316_aa1
2502879451	ISArsp14			Myr02_01815	ISSis6_aa1											2502879452	ISSto12_aa2			Ga0254970_11954	ISCaje5_aa2
2502879452	ISSto12			Myr02_01822	TnAs1_aa3											2502879453	ISC1316_aa1			Ga0254970_12001	ISC1316_aa1
2502879453	ISC1316			Myr02_01833	ISC1926_aa2											2502879460	ISSto14_aa1
2502879460	ISSto14			Myr02_01846	ISC1926_aa2											2502879468	ISArsp9_aa2
2502879468	ISArsp9			Myr02_01849	ISMye1_aa1											2502879477	ISC1913_aa2
2502879477	ISC1913			Myr02_01872	ISC1205_aa1											2502879478	ISC1913_aa1
2502879478	ISC1913			Myr02_01877	ISC1926_aa2											2502879482	ISC1926_aa2
2502879482	ISC1926			Myr02_01882	ISC1926_aa2
				Myr02_01893	ISC1926_aa2
				Myr02_01894	ISSto12_aa2
				Myr02_01902	ISArsp14_aa5
				Myr02_01922	ISC1205_aa1
				Myr02_01925	ISSis4_aa1
				Myr02_01933	ISSto12_aa2
				Myr02_01960	ISMye1_aa1
				Myr02_01961	ISMye1_aa1
				Myr02_01962	ISMye1_aa1
				Myr02_01981	ISMye1_aa1
				Myr02_01982	ISSto12_aa2
				Myr02_01989	ISMye1_aa1
				Myr02_01992	ISPre3_aa4
				Myr02_01996	ISC1205_aa1
				Myr02_01999	ISSis4_aa1
				Myr02_02009	ISC1205_aa1
				Myr02_02036	ISSis7_aa1
				Myr02_02039	ISArsp14_aa11
				Myr02_02041	ISC1316_aa1
				Myr02_02042	ISSto12_aa2
				Myr02_02055	ISC1205_aa1
				Myr02_02056	ISC1205_aa1
				Myr02_02086	ISNhu1_aa2
				Myr02_02088	ISSis6_aa1
				Myr02_02093	ISSis4_aa1
				Myr02_02104	ISC1926_aa2
				Myr02_02105	ISC1913_aa1
				Myr02_02112	ISMye1_aa1
				Myr02_02119	ISC1926_aa2
				Myr02_02122	ISSis4_aa1
				Myr02_02123	ISAcba1_aa2
				Myr02_02125	ISSto12_aa2
				Myr02_02135	ISArsp14_aa11
				Myr02_02137	ISSis6_aa1
				Myr02_02154	ISC1926_aa2
				Myr02_02159	ISSis6_aa1
				Myr02_02167	ISMye1_aa1
				Myr02_02168	ISSis6_aa1
				Myr02_02207	ISC1926_aa2
				Myr02_02214	ISArsp14_aa5
				Myr02_02221	ISC1904_aa1
				Myr02_02222	ISSis7_aa1
				Myr02_02224	TnAs1_aa3
				Myr02_02226	ISSis4_aa1
				Myr02_02227	ISC1205_aa1
				Myr02_02228	ISC1205_aa1
				Myr02_02241	ISSis7_aa1
				Myr02_02246	ISSis6_aa1
				Myr02_02276	ISSto12_aa2
				Myr02_02283	ISC1205_aa1
				Myr02_02294	ISMye1_aa1
				Myr02_02297	ISC1225_aa1
				Myr02_02305	ISArsp14_aa5
				Myr02_02329	ISC1205_aa1
				Myr02_02330	ISSis4_aa1
				Myr02_02331	ISSis4_aa1
				Myr02_02336	ISStma11_aa2
				Myr02_02338	ISSto12_aa2
				Myr02_02343	ISArsp14_aa5
				Myr02_02345	ISSis5_aa2
				Myr02_02346	ISSis5_aa2
				Myr02_02354	ISMye1_aa1
				Myr02_02357	ISArsp14_aa5

## Sheet: CRISPR-Cas
Supplement Table S3C: CRISPR-Cas related sequences present in the genomes of Metallosphaera spp. identified with CRISPRCasFinder++.
Metallosphaera_cuprina_Ar_4
Element	CRISPR Id /	Start	End	Spacer /	Repeat consensus /	Direction	Evidence Level
	Cas Type			Gene	cas genes
CRISPR	CP002656_1	851885	852132	2	GAAGAGGCGTTAGAAGAACTAAACAACGCAATAAAACTGAATCC	ND	1
CRISPR	CP002656_2	985208	997384	189	CTTTCAACTCCATGAAGGATTCTAC	-	4
CRISPR	CP002656_3	1006630	1012602	93	GTAGAATCCTTCATGGAGTTGAAAG	+	4
Cas cluster	CAS-TypeIIID	1019726	1031166	7	Csm3_0_IIID, Csm3_1_IIID, Cas10_0_III, Csm3_1_IIIAD, Csm3_1_IIIAD, Csm3_1_IIID, Cas6_0_I-III
Cas cluster	CAS-TypeIA	1031899	1037372	5	Csa5_0_IA, Cas7_0_IA, Cas5_0_IA, Cas3_0_I, CsaX_0_IA
Metallosphaera_hakonensis_HO1-1
Element	CRISPR Id /	Start	End	Spacer /	Repeat consensus /	Direction	Evidence Level
	Cas Type			Gene	cas genes
CRISPR	CP029287_1	194344	194430	1	GTTAAACATGAGTTGTGGATTACC	ND	1
CRISPR	CP029287_2	384882	388623	55	GTTTCAAACCCTCTAAGGAACCCTACAAAC	ND	4
CRISPR	CP029287_3	389889	392542	39	GTTTCAAACCCTCTAAGGAACCCTACAAAC	ND	4
Cas cluster	CAS-TypeIB	397622	405130	5	Cas1_0_I-II-III, Cas8a1_1_IB, Cas7_2_IB, Cas5_1_IB, Cas3_0_I
Cas cluster	CAS-TypeIIID	420114	435427	8	Cas6_0_I-III, Csm3_1_IIID, Csm3_1_IIID, Csm3_0_IIID, Cas10_0_III, Csm3_0_IIID, Csm3_1_IIIAD, Cas6_0_I-III
CRISPR	CP029287_4	501010	512636	173	GTTTGTAGGGTTCCTTAGAGGGTTTGAAAC	ND	4
CRISPR	CP029287_5	2418151	2418280	1	ATATTTTTACAGGTACTTATCGAATAAGATGACTGCATGAGAACACTCCC	ND	1
CRISPR	CP029287_6	2504564	2508171	56	CTTTCAATTCCTTTTGGGATGCAAC	ND	4
CRISPR	CP029287_7	2530041	2533294	50	GTTGCATCCCAAAAAGGAATTGAAAG	ND	4
CRISPR	CP029287_8	2539128	2539223	1	CGTTTGTAGATATCCTTAGAGGGTTTGAAA	ND	1
Metallosphaera_hakonensis_JCM_8857
Element	CRISPR Id /	Start	End	Spacer /	Repeat consensus /	Direction	Evidence Level
	Cas Type			Gene	cas genes
CRISPR	BBBA01000019_1	16607	16727	1	GACTCACTGAGCTGAGCGAACCTCTCCTCGTTCTTCT	ND	1
CRISPR	BBBA01000024_1	2010	5263	50	CTTTCAATTCCTTTTTGGGATGCAAC	ND	4
Cas cluster	CAS-TypeIA	5983	6627	1	Cas4_0_IA
Cas cluster	CAS	7217	22177	3	Cas1_0_I-II-III, Cas2_0_I-II-III-V, Cas6_0_I-III
Cas cluster	CAS-TypeIIIA	9870	18431	3	Cas10_0_IIIA, Csm4_0_IIIA, Csm5_0_IIIA
Cas cluster	CAS-TypeIIID	14830	15792	1	Csm3_1_IIID
CRISPR	BBBA01000036_1	14244	14332	1	GGTAATCCACAACTCATGTTTAAC	ND	1
CRISPR	BBBA01000037_1	549	678	1	ATATTTTTACAGGTACTTATCGAATAAGATGACTGCATGAGAACACTCCC	ND	1
Cas cluster	CAS	1996	2547	1	Cas4_0_I-II
CRISPR	BBBA01000063_1	3376	6983	56	CTTTCAATTCCTTTTGGGATGCAAC	ND	4
CRISPR	BBBA01000077_1	1304	1399	1	CGTTTGTAGATATCCTTAGAGGGTTTGAAA	ND	1
Metallosphaera_My_r02
Element	CRISPR Id /	Start	End	Spacer /	Repeat consensus /	Direction	Evidence Level
	Cas Type			Gene	cas genes
CRISPR	Myr02_My-r02_scf1118686615516_1	12452	12599	1	CTAGCAGTGGAGGAACTTCTGCGTCTGACAACAGCCTAATCATTCTACC	ND	1
CRISPR	Myr02_My-r02_scf1118686616298_1	275	368	1	TCGCCGAGTCCGTCCCCACCCGTGGCTC	ND	1
Cas cluster	CAS-TypeIIIA	8894	9601	1	Csm2_0_IIIA
CRISPR	Myr02_My-r02_scf1118686615645_1	10776	10868	1	GAGAAAACTCCTGAATGTATCCTTGG	ND	1
CRISPR	Myr02_My-r02_scf1118686615617_1	14991	15091	1	CTTTCAATTCCTTTGAGGATGAAAC	ND	1
CRISPR	Myr02_My-r02_scf1118686615617_2	15194	16183	15	CTTTCAATTCCTTTGAGGATGAAAC	ND	4
CRISPR	Myr02_My-r02_scf1118686615617_3	16252	17638	21	CTTTCAATTCCTTTGAGGATGAAAC	ND	4
Cas cluster	CAS-TypeIA	1545	8894	3	Cas4_0_IA, Cas7_0_IA, Csa5_0_IA
CRISPR	Myr02_My-r02_scf1118686615589_1	4882	4982	1	ATCTTTCAGTTCCTTTGAGGATGAAA	ND	1
Cas cluster	CAS	6167	7867	3	Cas1_0_I-II-III, Cas2_0_I-II-III-V, Cas4_0_I-II
CRISPR	Myr02_My-r02_scf1118686615589_2	9207	9677	7	GTTGATCTTGGATAGAATTGAAAG	ND	4
Metallosphaera_My_r05
Element	CRISPR Id /	Start	End	Spacer /	Repeat consensus /	Direction	Evidence Level
	Cas Type			Gene	cas genes
CRISPR	YNP_14_mk_ospSpri14_050609_1_scaffolds_scf1118686615516_1	12452	12599	1	CTAGCAGTGGAGGAACTTCTGCGTCTGACAACAGCCTAATCATTCTACC	ND	1
CRISPR	YNP_14_mk_ospSpri14_050609_1_scaffolds_scf1118686616298_1	275	368	1	TCGCCGAGTCCGTCCCCACCCGTGGCTC	ND	1
Cas cluster	CAS-TypeIIIA	8894	9601	1	Csm2_0_IIIA
Metallosphaera_My_r06
0
Metallosphaera_sedula_ARS50-1
Element	CRISPR Id /	Start	End	Spacer /	Repeat consensus /	Direction	Evidence Level
	Cas Type			Gene	cas genes
Cas cluster	CAS-TypeIA	1073315	1102154	12	Cas6_0_I-III, CsaX_0_IA, Cas3_1_I, Cas3_0_I, Cas5_0_IA, Cas7_0_IA, Csa5_0_IA, Cas4_0_IA, Cas1_0_I-II-III, Cas2_0_I-II-III-V, Cas4_0_I-II, Cas6_0_I-III
CRISPR	CP012172_1	1082258	1082537	4	CTTTCAACTCTATAGGAGATTAAC	+	4
CRISPR	CP012172_2	1082639	1091912	144	CTTTCAACTCTATAGGAGATTAAC	+	4
CRISPR	CP012172_3	1097329	1100891	55	CTTAATCTCCTATAGAGTTGAAAG	-	4
CRISPR	CP012172_4	1104343	1114688	161	GTTAATCTTCTATAGAGTTGAAAG	-	4
Cas cluster	CAS-TypeIIID	1124107	1137619	8	Csm3_1_IIIAD, Csm3_1_IIIAD, Csm3_0_IIID, Cas10_0_III, Csm3_1_IIID, Csm3_1_IIIAD, Cas6_0_I-III, Cas3_1_I
CRISPR	CP012172_5	1136259	1136558	4	GTTTCAAACCCTCGAAGGATCTCTACAAAC	ND	4
Metallosphaera_sedula_ARS50-2
Element	CRISPR Id /	Start	End	Spacer /	Repeat consensus /	Direction	Evidence Level
	Cas Type			Gene	cas genes
Cas cluster	CAS-TypeIA	1073311	1102150	12	Cas6_0_I-III, CsaX_0_IA, Cas3_1_I, Cas3_0_I, Cas5_0_IA, Cas7_0_IA, Csa5_0_IA, Cas4_0_IA, Cas1_0_I-II-III, Cas2_0_I-II-III-V, Cas4_0_I-II, Cas6_0_I-III
CRISPR	CP012173_1	1082254	1082533	4	CTTTCAACTCTATAGGAGATTAAC	+	4
CRISPR	CP012173_2	1082635	1091908	144	CTTTCAACTCTATAGGAGATTAAC	+	4
CRISPR	CP012173_3	1097325	1100887	55	CTTAATCTCCTATAGAGTTGAAAG	-	4
CRISPR	CP012173_4	1104339	1114684	161	GTTAATCTTCTATAGAGTTGAAAG	-	4
Cas cluster	CAS-TypeIIID	1124103	1137615	8	Csm3_1_IIIAD, Csm3_1_IIIAD, Csm3_0_IIID, Cas10_0_III, Csm3_1_IIID, Csm3_1_IIIAD, Cas6_0_I-III, Cas3_1_I
CRISPR	CP012173_5	1136255	1136554	4	GTTTCAAACCCTCGAAGGATCTCTACAAAC	ND	4
Metallosphaera_sedula_ARS120-1
Element	CRISPR Id /	Start	End	Spacer /	Repeat consensus /	Direction	Evidence Level
	Cas Type			Gene	cas genes
Cas cluster	CAS-TypeIA	1073313	1102152	12	Cas6_0_I-III, CsaX_0_IA, Cas3_1_I, Cas3_0_I, Cas5_0_IA, Cas7_0_IA, Csa5_0_IA, Cas4_0_IA, Cas1_0_I-II-III, Cas2_0_I-II-III-V, Cas4_0_I-II, Cas6_0_I-III
CRISPR	CP012174_1	1082256	1082535	4	CTTTCAACTCTATAGGAGATTAAC	+	4
CRISPR	CP012174_2	1082637	1091910	144	CTTTCAACTCTATAGGAGATTAAC	+	4
CRISPR	CP012174_3	1097327	1100889	55	CTTAATCTCCTATAGAGTTGAAAG	-	4
CRISPR	CP012174_4	1104341	1114686	161	GTTAATCTTCTATAGAGTTGAAAG	-	4
Cas cluster	CAS-TypeIIID	1124105	1137617	8	Csm3_1_IIIAD, Csm3_1_IIIAD, Csm3_0_IIID, Cas10_0_III, Csm3_1_IIID, Csm3_1_IIIAD, Cas6_0_I-III, Cas3_1_I
CRISPR	CP012174_5	1136257	1136556	4	GTTTCAAACCCTCGAAGGATCTCTACAAAC	ND	4
Metallosphaera_sedula_ARS120-2
Element	CRISPR Id /	Start	End	Spacer /	Repeat consensus /	Direction	Evidence Level
	Cas Type			Gene	cas genes
Cas cluster	CAS-TypeIA	1073315	1102154	12	Cas6_0_I-III, CsaX_0_IA, Cas3_1_I, Cas3_0_I, Cas5_0_IA, Cas7_0_IA, Csa5_0_IA, Cas4_0_IA, Cas1_0_I-II-III, Cas2_0_I-II-III-V, Cas4_0_I-II, Cas6_0_I-III
CRISPR	CP012175_1	1082258	1082537	4	CTTTCAACTCTATAGGAGATTAAC	+	4
CRISPR	CP012175_2	1082639	1091912	144	CTTTCAACTCTATAGGAGATTAAC	+	4
CRISPR	CP012175_3	1097329	1100891	55	CTTAATCTCCTATAGAGTTGAAAG	-	4
CRISPR	CP012175_4	1104343	1114688	161	GTTAATCTTCTATAGAGTTGAAAG	-	4
Cas cluster	CAS-TypeIIID	1124107	1137619	8	Csm3_1_IIIAD, Csm3_1_IIIAD, Csm3_0_IIID, Cas10_0_III, Csm3_1_IIID, Csm3_1_IIIAD, Cas6_0_I-III, Cas3_1_I
CRISPR	CP012175_5	1136259	1136558	4	GTTTCAAACCCTCGAAGGATCTCTACAAAC	ND	4
Metallosphaera_sedula_CuR1
Element	CRISPR Id /	Start	End	Spacer /	Repeat consensus /	Direction	Evidence Level
	Cas Type			Gene	cas genes
Cas cluster	CAS-TypeIA	1073281	1102120	12	Cas6_0_I-III, CsaX_0_IA, Cas3_1_I, Cas3_0_I, Cas5_0_IA, Cas7_0_IA, Csa5_0_IA, Cas4_0_IA, Cas1_0_I-II-III, Cas2_0_I-II-III-V, Cas4_0_I-II, Cas6_0_I-III
CRISPR	CP008822_1	1082224	1082503	4	CTTTCAACTCTATAGGAGATTAAC	+	4
CRISPR	CP008822_2	1082605	1091878	144	CTTTCAACTCTATAGGAGATTAAC	+	4
CRISPR	CP008822_3	1097295	1100857	55	CTTAATCTCCTATAGAGTTGAAAG	-	4
CRISPR	CP008822_4	1104309	1114654	161	GTTAATCTTCTATAGAGTTGAAAG	-	4
Cas cluster	CAS-TypeIIID	1124073	1137585	8	Csm3_1_IIIAD, Csm3_1_IIIAD, Csm3_0_IIID, Cas10_0_III, Csm3_1_IIID, Csm3_1_IIIAD, Cas6_0_I-III, Cas3_1_I
CRISPR	CP008822_5	1136225	1136524	4	GTTTCAAACCCTCGAAGGATCTCTACAAAC	ND	4
Metallosphaera_sedula_DSM_5348
Element	CRISPR Id /	Start	End	Spacer /	Repeat consensus /	Direction	Evidence Level
	Cas Type			Gene	cas genes
Cas cluster	CAS-TypeIA	1073299	1102138	12	Cas6_0_I-III, CsaX_0_IA, Cas3_1_I, Cas3_0_I, Cas5_0_IA, Cas7_0_IA, Csa5_0_IA, Cas4_0_IA, Cas1_0_I-II-III, Cas2_0_I-II-III-V, Cas4_0_I-II, Cas6_0_I-III
CRISPR	CP000682_1	1082242	1082521	4	CTTTCAACTCTATAGGAGATTAAC	+	4
CRISPR	CP000682_2	1082623	1091896	144	CTTTCAACTCTATAGGAGATTAAC	+	4
CRISPR	CP000682_3	1097313	1100875	55	CTTAATCTCCTATAGAGTTGAAAG	-	4
CRISPR	CP000682_4	1104327	1114672	161	GTTAATCTTCTATAGAGTTGAAAG	-	4
Cas cluster	CAS-TypeIIID	1124091	1137603	8	Csm3_1_IIIAD, Csm3_1_IIIAD, Csm3_0_IIID, Cas10_0_III, Csm3_1_IIID, Csm3_1_IIIAD, Cas6_0_I-III, Cas3_1_I
CRISPR	CP000682_5	1136243	1136542	4	GTTTCAAACCCTCGAAGGATCTCTACAAAC	ND	4
Metallosphaera_sedula_SARC-M1
Element	CRISPR Id /	Start	End	Spacer /	Repeat consensus /	Direction	Evidence Level
	Cas Type			Gene	cas genes
Cas cluster	CAS-TypeIA	1073315	1102154	12	Cas6_0_I-III, CsaX_0_IA, Cas3_1_I, Cas3_0_I, Cas5_0_IA, Cas7_0_IA, Csa5_0_IA, Cas4_0_IA, Cas1_0_I-II-III, Cas2_0_I-II-III-V, Cas4_0_I-II, Cas6_0_I-III
CRISPR	CP012176_1	1082258	1082537	4	CTTTCAACTCTATAGGAGATTAAC	+	4
CRISPR	CP012176_2	1082639	1091912	144	CTTTCAACTCTATAGGAGATTAAC	+	4
CRISPR	CP012176_3	1097329	1100891	55	CTTAATCTCCTATAGAGTTGAAAG	-	4
CRISPR	CP012176_4	1104343	1114688	161	GTTAATCTTCTATAGAGTTGAAAG	-	4
Cas cluster	CAS-TypeIIID	1124107	1137619	8	Csm3_1_IIIAD, Csm3_1_IIIAD, Csm3_0_IIID, Cas10_0_III, Csm3_1_IIID, Csm3_1_IIIAD, Cas6_0_I-III, Cas3_1_I
CRISPR	CP012176_5	1136259	1136558	4	GTTTCAAACCCTCGAAGGATCTCTACAAAC	ND	4
Metallosphaera_sp._Obs4
Element	CRISPR Id /	Start	End	Spacer /	Repeat consensus /	Direction	Evidence Level
	Cas Type			Gene	cas genes
CRISPR	Ga0254970_1022_1	2644	2730	1	TTTTTATATGGCTATTATTCATT	ND	1
CRISPR	Ga0254970_1027_1	11415	11546	1	GGGCATAAGACTGGACAGCTTAACGGTGGAGCAAAGGGA	ND	1
CRISPR	Ga0254970_1122_1	2644	2730	1	TTTTTATATGGCTATTATTCATT	ND	1
CRISPR	Ga0254970_1127_1	11415	11546	1	GGGCATAAGACTGGACAGCTTAACGGTGGAGCAAAGGGA	ND	1
Metallosphaera_sp._YNP_08
Element	CRISPR Id /	Start	End	Spacer /	Repeat consensus /	Direction	Evidence Level
	Cas Type			Gene	cas genes
Cas cluster	CAS	471	1275	2	Cas2_0_I-II-III-V, Cas4_0_I-II
CRISPR	YNP_08_myel_ospSpri8_050609_1_scaffolds_scf1118686596856_1	2511	2621	1	TTTCACCGAGGTGTTTTCATCCTCAAAGGAACTGAA	ND	1
CRISPR	YNP_08_myel_ospSpri8_050609_1_scaffolds_scf1118686594832_1	539	640	1	ACGTGCAAACATATGGTTGAGAGG	ND	1
CRISPR	YNP_08_myel_ospSpri8_050609_1_scaffolds_scf1118686596722_1	3720	3815	1	TCGCCGAGTCCGTCCCCACCCGTGGCTCCC	ND	1
CRISPR	YNP_08_myel_ospSpri8_050609_1_scaffolds_scf1118686595490_1	212	353	1	TTTGCATTAGTGGTAGGAGTTTTTCTGTAGCGTCAAGTAGTGAGTCTAC	ND	1
Metallosphaera_sp._YNP_14
Element	CRISPR Id /	Start	End	Spacer /	Repeat consensus /	Direction	Evidence Level
	Cas Type			Gene	cas genes
CRISPR	YNP_14_mk_ospSpri14_050609_1_scaffolds_scf1118686615516_1	12452	12599	1	CTAGCAGTGGAGGAACTTCTGCGTCTGACAACAGCCTAATCATTCTACC	ND	1
CRISPR	YNP_14_mk_ospSpri14_050609_1_scaffolds_scf1118686616298_1	275	368	1	TCGCCGAGTCCGTCCCCACCCGTGGCTC	ND	1
Cas cluster	CAS-TypeIIIA	8894	9601	1	Csm2_0_IIIA
Metallosphaera_sp_UBA165
Element	CRISPR Id /	Start	End	Spacer /	Repeat consensus /	Direction	Evidence Level
	Cas Type			Gene	cas genes
CRISPR	DAJX01000004_1	1959	2043	1	TATTAGTAACTAATAGGGGTACT	ND	1
CRISPR	DAJX01000079_1	15721	15803	1	GAACTACCTGACGAAGATGAACCGCT	ND	1
CRISPR	DAJX01000007_1	21949	22030	1	GGAGGAGATGAAGAGGATAAGGGAGGAG	ND	1
Metallosphaera_tengchongensis Ric-A				3
Element	CRISPR Id /	Start	End	Spacer /	Repeat consensus /	Direction	Evidence Level
	Cas Type			Gene	cas genes
Cas cluster	CAS-TypeIA	1913215	1920166	7	Cas6_0_I-III, Csa5_0_IA, Cas7_0_IA, Cas5_0_IA, Cas3_0_I, Cas3_1_I, CsaX_0_IA
CRISPR	Metallosphaera_1	1922884	1922968	1	ctttcaactctatggaagatcaac	ND	1
CRISPR	Metallosphaera_2	1923133	1930001	107	ctttcaactctatggaagatcaac	ND	4
CRISPR	Metallosphaera_3	1940920	1951070	158	gttgatcttccatagagttgaaag	ND	4
CRISPR	Metallosphaera_4	1951149	1951236	1	gttgatcttccatagagttgaaag	ND	1
CRISPR	Metallosphaera_5	1977485	1981714	66	ctttcaattcctttttggatgcaac	ND	4
CRISPR	Metallosphaera_6	1987613	1991693	63	gttgcatccaaaaaggaattgaaag	ND	4
Cas cluster	CAS-TypeIIID	2002673	2012190	7	Csm3_0_IIID, Csm3_0_IIID, Cas10_0_III, Csm3_0_IIID, Csm3_1_IIID, Csm3_1_IIID, Cas6_0_I-III
Metallosphaera_yellowstonensis_MK1
Element	CRISPR Id /	Start	End	Spacer /	Repeat consensus /	Direction	Evidence Level
	Cas Type			Gene	cas genes
CRISPR	JH597758_1	20192	20285	1	GAGCCACGGGTGGGGACGGACTCGGCGA	ND	1
CRISPR	JH597761_1	99609	99701	1	GAGAAAACTCCTGAATGTATCCTTGG	ND	1
CRISPR	JH597761_2	180752	188750	126	CTTTCAATTCTATCCAAGATCAAC	ND	4
Cas cluster	CAS-TypeIA	189063	200469	10	Cas4_0_IA, Cas1_0_I-II-III, Cas2_0_I-II-III-V, Cas4_0_I-II, Csa5_0_IA, Cas7_0_IA, Cas5_0_IA, Cas3_0_I, Cas3_1_I, CsaX_0_IA
CRISPR	JH597761_3	192976	193208	3	TTTCATCCTCAAAGGAACTGAAGGAT	ND	1
Cas cluster	CAS-TypeIIID	205295	219221	9	Csm3_1_IIID, Csm3_0_IIID, Cas10_0_III, Csm3_1_IIID, Csm3_0_IIID, Cas4_0_IA, Cas4_0_I-II, Cas1_0_I-II-III, Cas2_0_I-II-III
CRISPR	JH597761_4	212480	215877	52	CTTTCAATTCCTTTGAGGATGAAAC	ND	4
CRISPR	JH597761_5	221207	224287	47	GTTTCATCCTCAAAGGAATTGAAAG	ND	4
CRISPR	JH597761_6	423387	423477	1	TATTGCTCATATTGGCGGGAGTGTT	ND	1
CRISPR	JH597761_7	1154601	1154694	1	GAGCCACGGGTGGGGACGGACTCGGCGA	ND	1
CRISPR	JH597761_8	1224977	1225070	1	TCGCCGAGTCCTTCCCCACCCGTGGCTC	ND	1
CRISPR	JH597766_1	2315	2407	1	CCAAGGATGCATTCAGGAGTTTTCTC	ND	1
CRISPR	JH597770_1	767291	767384	1	GAGCCACGGGTGGGGACGGACTCGGCGA	ND	1

## Sheet: Prophage
Supplement Table S3C: prophages and prophage remnants sequences present in the genomes of Metallosphaera spp. identified with PHASTER.
Region	Region Length	Completeness	Score	# Total Proteins	Region Position	Most Common Phage	GC %
Metallosphaera cuprina Ar-4				8
1	6.8Kb	incomplete	10	8	830962-837813 info_outline	PHAGE_Entero_phi92_NC_023693(4)	0.3363
Metallosphaera yellowstonensis MK1				23
1	26.2Kb	incomplete	30	23	281182-307432 info_outline	PHAGE_Sulfol_5_NC_011217(13)	0.4479
Metallosphaera sedula strain CuR1				25
1	7.9Kb	incomplete	10	12	108871-116799 info_outline	PHAGE_Acidia_virus_NC_007409(3)	0.4109
2	7.6Kb	incomplete	30	13	1792415-1800039 info_outline	PHAGE_Entero_phi92_NC_023693(2)	0.4843
Metallosphaera sedula strain ARS50-1				26
1	7.9Kb	incomplete	10	12	108887-116815 info_outline	PHAGE_Acidia_virus_NC_007409(3)	0.4109
2	7.7Kb	incomplete	30	14	1792379-1800079 info_outline	PHAGE_Entero_phi92_NC_023693(2)	0.4911
Metallosphaera sedula strain ARS50-2				25
1	7.9Kb	incomplete	10	12	108887-116815 info_outline	PHAGE_Acidia_virus_NC_007409(3)	0.4109
2	7.7Kb	incomplete	30	13	1792375-1800075 info_outline	PHAGE_Entero_phi92_NC_023693(2)	0.4911
Metallosphaera sedula strain ARS120-1				26
1	7.9Kb	incomplete	10	12	108885-116813 info_outline	PHAGE_Acidia_virus_NC_007409(3)	0.4109
2	7.7Kb	incomplete	30	14	1792377-1800077 info_outline	PHAGE_Entero_phi92_NC_023693(2)	0.4912
Metallosphaera sedula strain ARS120-2				26
1	7.9Kb	incomplete	10	12	108887-116815 info_outline	PHAGE_Acidia_virus_NC_007409(3)	0.4109
2	7.7Kb	incomplete	30	14	1792379-1800079 info_outline	PHAGE_Entero_phi92_NC_023693(2)	0.4912
Metallosphaera sedula strain SARC-M1				27
1	7.9Kb	incomplete	10	12	108887-116815 info_outline	PHAGE_Acidia_virus_NC_007409(3)	0.4109
2	7.7Kb	incomplete	30	15	1792379-1800079 info_outline	PHAGE_Entero_phi92_NC_023693(2)	0.4912
Metallosphaera sedula DSM 5348				9
1	7.7Kb	incomplete	30	9	1792363-1800063 info_outline	PHAGE_Entero_phi92_NC_023693(2)	0.4912
Metallosphaera hakonensis strain HO1-1				8
1	7.4Kb	incomplete	40	8	1098931-1106335 info_outline	PHAGE_Cronob_CR5_NC_021531(1)	0.4524
Metallosphaera_hakonensis_JCM_8857				15
1	12.5Kb	questionable	70	15	2371955-2384512 info_outline	PHAGE_Acidia_virus_NC_007409(4)	0.4719
Metallosphaera sp. YNP_14				3
1	6.4Kb	incomplete	10	3	6987-13475 info_outline	PHAGE_Sulfol_SMV3_NC_029103(2)	0.4958
Metallosphaera_sp_My_r06				8
1	4Kb	incomplete	60	8	291225-295302 info_outline	PHAGE_Clostr_c_st_NC_007581(3)	0.4691
Metallosphaera_sp_My_r05				3
1	6.4Kb	incomplete	10	3	6987-13475 info_outline	PHAGE_Sulfol_SMV3_NC_029103(2)	0.4958
Metallosphaera_tengchongensis_Ric-A				23
1	7.1Kb	incomplete	40	11	962168-969303 info_outline	PHAGE_Mycoba_Porky_NC_011055(1)	0.41
2	6.4Kb	questionable	70	12	1143190-1149644 info_outline	PHAGE_Acidia_virus_NC_007409(3)	0.436
